# Supplementary material for: The effect of SGLT2 inhibition on prostate cancer: Mendelian randomization and observational analysis using electronic healthcare and cohort data
Source: PubMed Central journal article supplement (PMC11384955; doi:10.1016/j.xcrm.2024.101688), 2024-08-20
Supplement: mmc1.pdf [file mmc1.pdf]

**Supplemental information**

**The effect of SGLT2 inhibition on prostate cancer:**

**Mendelian randomization and observational analysis**

**using electronic healthcare and cohort data**

**Jie Zheng, Jieli Lu, Jiying Qi, Qian Yang, Huiling Zhao, Haoyu Liu, Zhihe Chen, Lanhui Huang, Youqiong Ye, Min Xu, Yu Xu, Tiange Wang, Mian Li, Zhiyun Zhao, Ruizhi Zheng, Shuangyuan Wang, Hong Lin, Chunyan Hu, Celine Sze Ling Chui, Shiu Lun Au Yeung, Shan Luo, Olympia Dimopoulou, Pdraig Dixon, Sean Harrison, Yi Liu, Jamie Robinson, James Yarmolinsky, Philip Haycock, Jinqiu Yuan, Sarah Lewis, Zhongshang Yuan, Tom R. Gaunt, George Davey Smith, Guang Ning, Richard M. Martin, Bin Cui, Weiqing Wang, and Yufang Bi**

**Supplementary Figure 1. Four sets of instruments been used in the Mendelian randomization analysis. Related to STAR Methods**

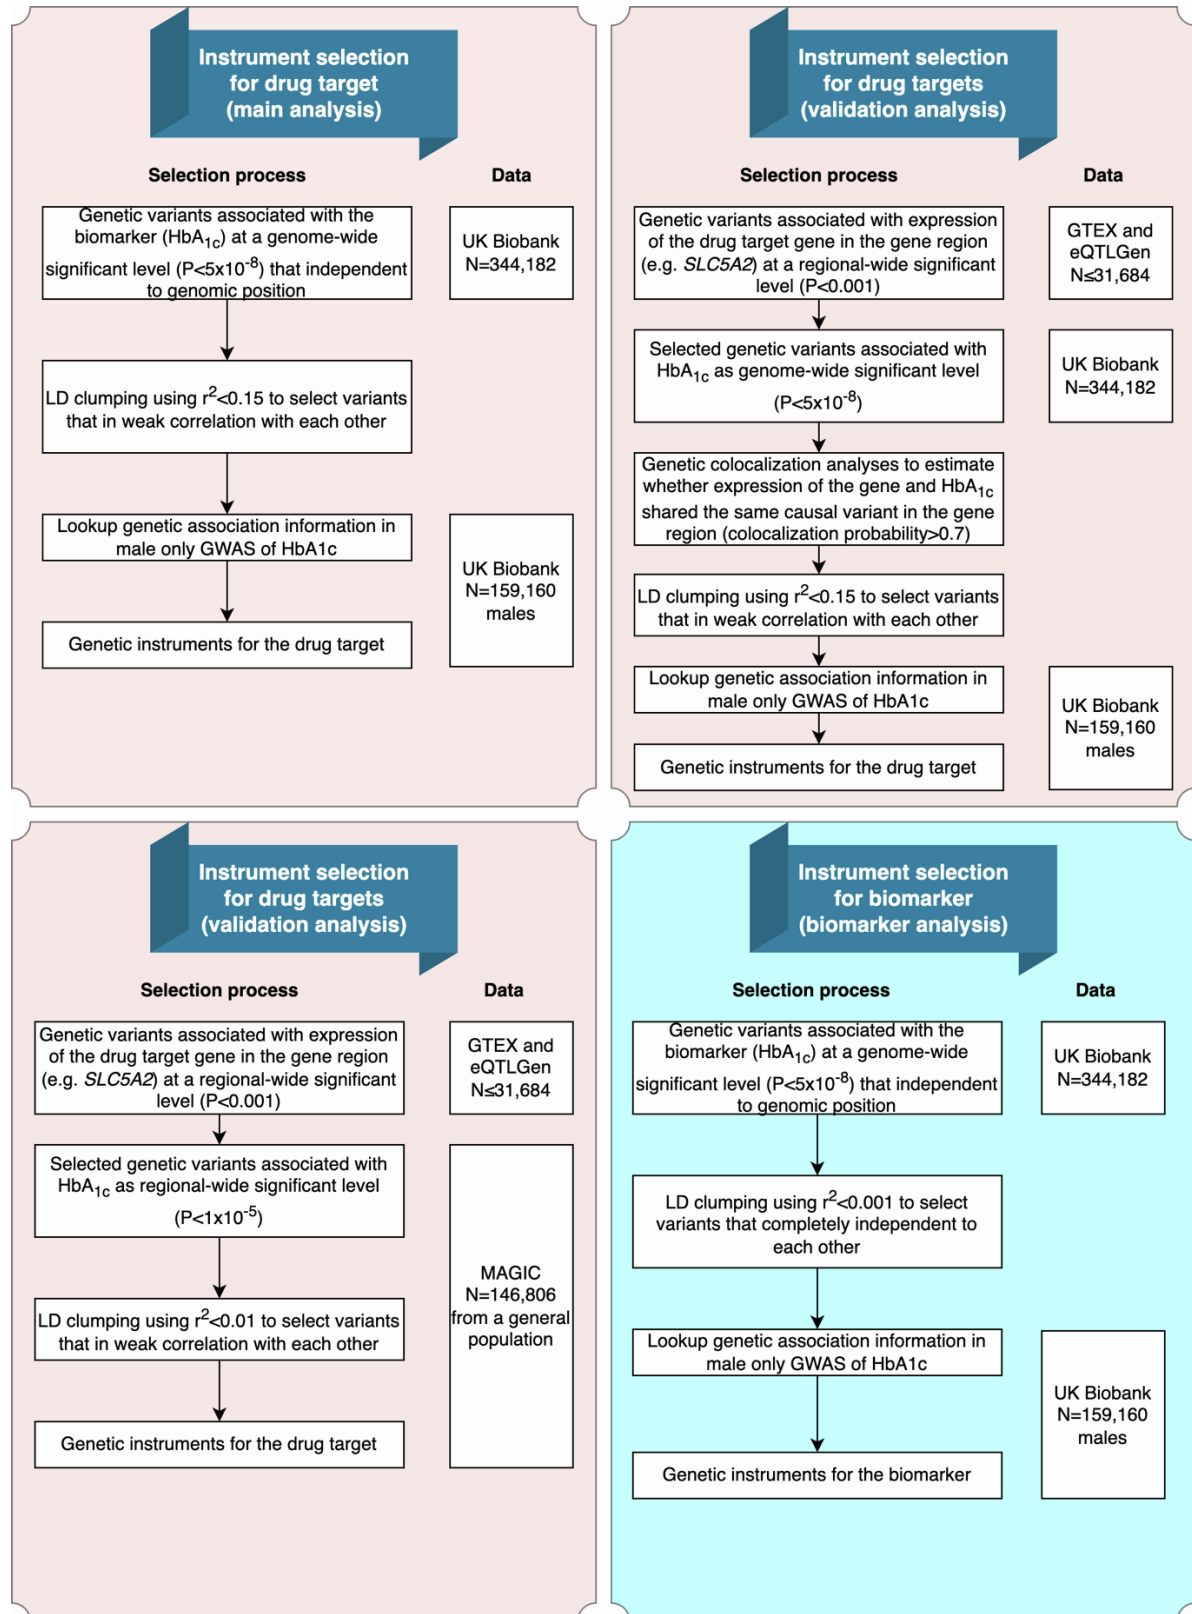

Supplementary Figure 2. Mendelian randomization assumptions. Related to STAR Methods

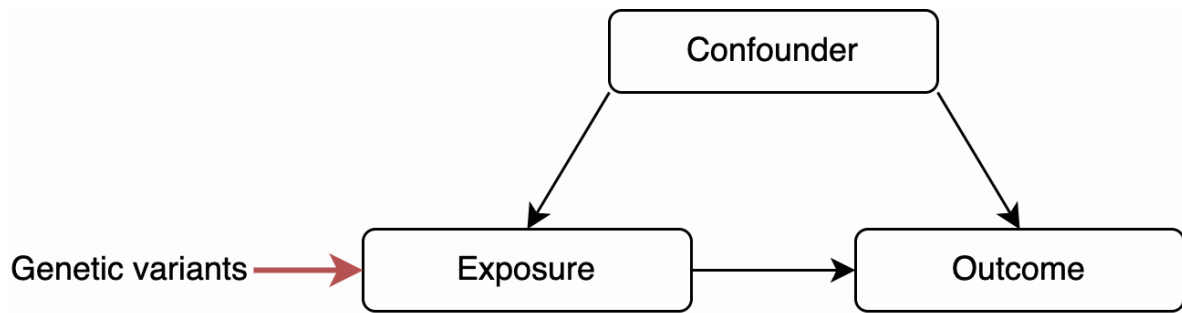

**Assumption 1 (relevance):** the germline genetic instruments used to proxy SGLT2 inhibition are robustly associated with the exposure.

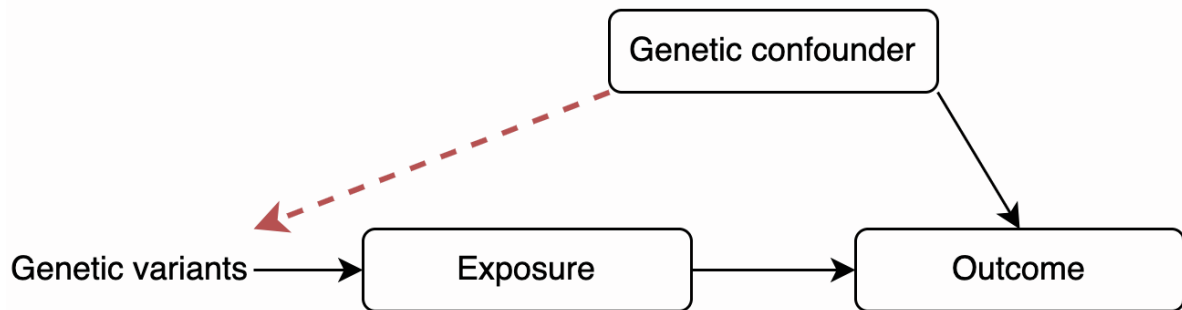

**Assumption 2 (independence):** no confounding of the relationship between the instruments and the outcome.

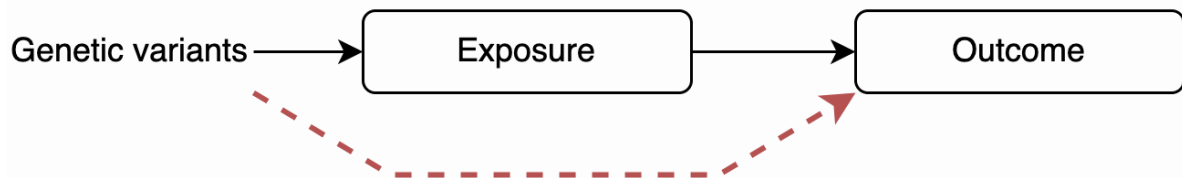

**Assumption 3 (exclusion restriction):** the instruments are only associated with the outcome through the exposure under study

**Supplementary Figure 3. Scatter plot and forest plot for the genetically proxied effect of SGLT2 inhibition on total prostate cancer. Related to STAR Methods**

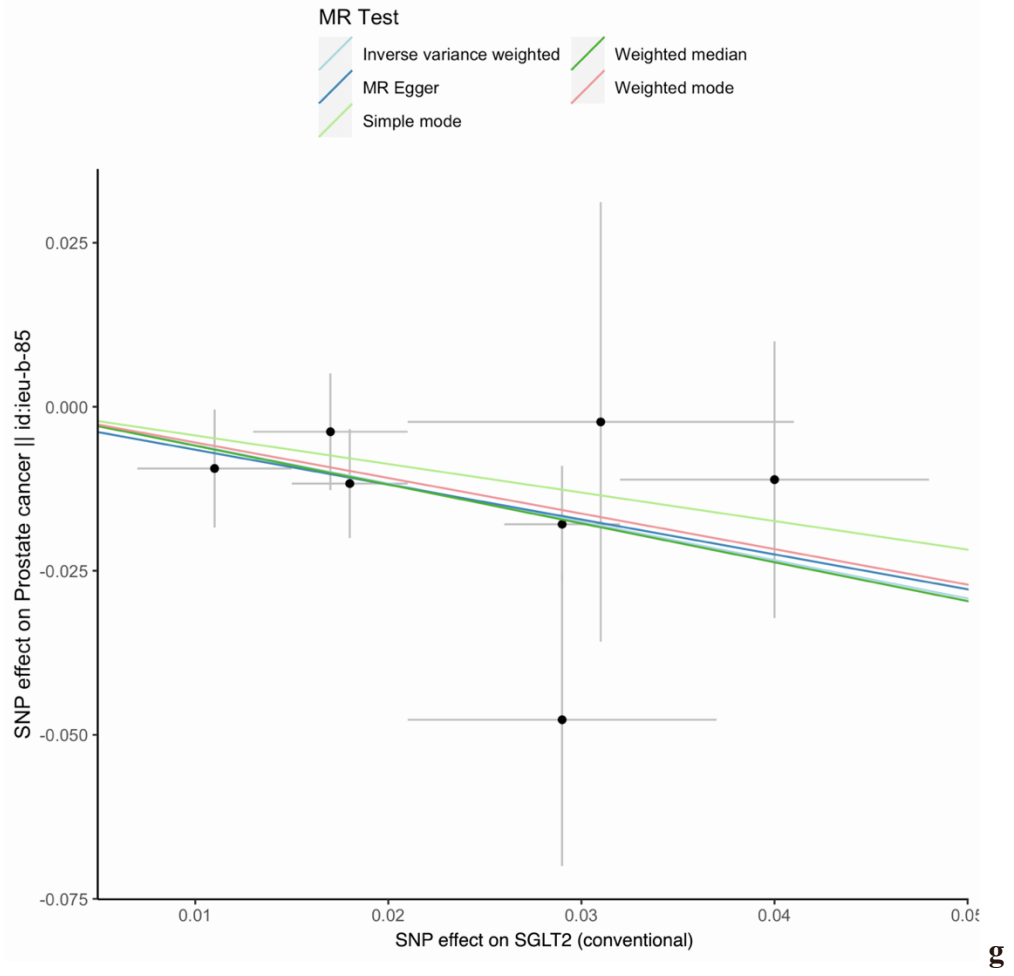

Supplementary Figure 4. Summary of key findings of the current study. Related to STAR Methods

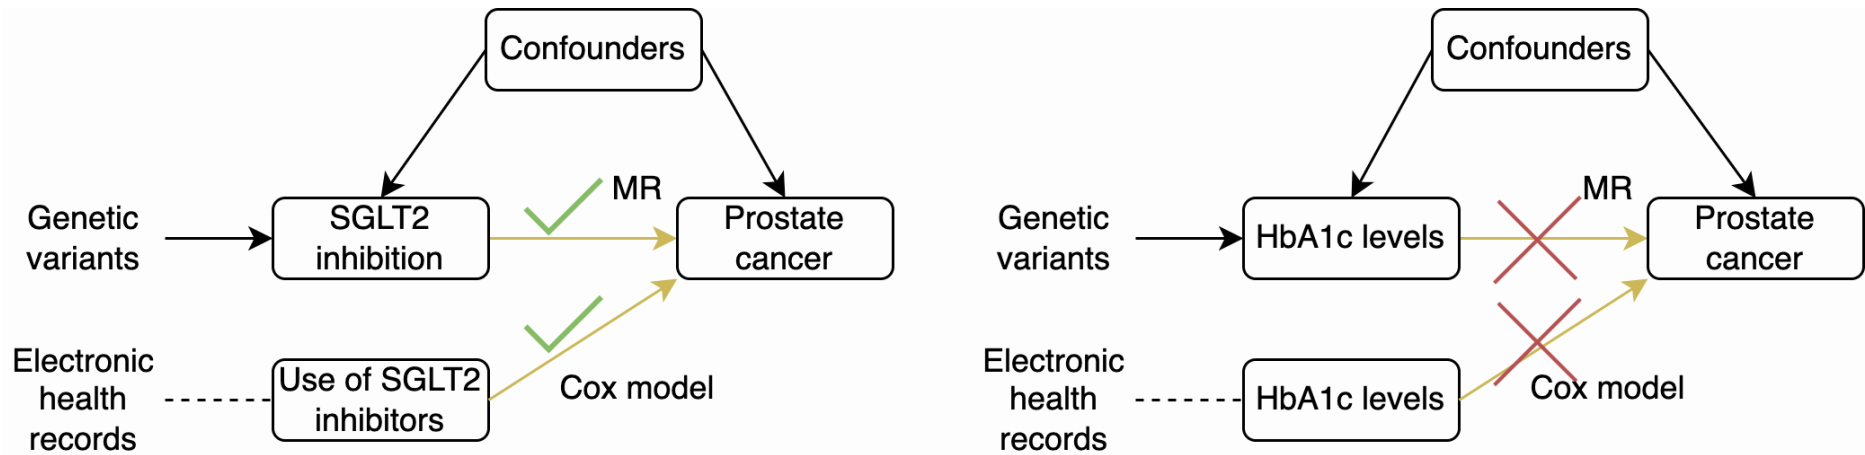

**Supplementary Table 1. Baseline characteristics of users of sodium glucose cotransporter 2 (SGLT2) inhibitors and DPP4 inhibitors, before and after propensity score matching (for the survival analysis). Related to STAR Methods**

|                                   | Original cohort        |                       |       | PS-matched cohort      |                       |        |
|-----------------------------------|------------------------|-----------------------|-------|------------------------|-----------------------|--------|
|                                   | SGLT2i<br>(n = 26,988) | DPP4i<br>(n = 54,134) | SMD   | SGLT2i<br>(n = 24,155) | DPP4i<br>(n = 24,155) | SMD    |
| Age, median (IQR)                 | 62 (54-69)             | 63 (56-70)            | 14.2% | 63 (55-69)             | 62 (55-69)            | 0.6%   |
| <b>Comorbidities, N (%)</b>       |                        |                       |       |                        |                       |        |
| BPH                               | 3,485 (12.91)          | 7,665 (14.16)         | 3.6%  | 3,138 (12.99)          | 3,256 (13.48)         | 1.4%   |
| Hypertension                      | 15,286 (56.64)         | 24,535 (45.32)        | 22.8% | 13,456 (55.71)         | 13,581 (56.22)        | 1.0%   |
| Dyslipidemia                      | 6,824 (25.29)          | 10,386 (19.19)        | 14.7% | 5,842 (24.19)          | 5,871 (24.31)         | 0.3%   |
| Diabetic complications            | 5,920 (21.94)          | 9,703 (17.92)         | 10.1% | 4,923 (20.38)          | 5,007 (20.73)         | 0.9%   |
| Ischemic heart disease            | 9,364 (34.70)          | 12,104 (22.36)        | 27.6% | 8,040 (33.29)          | 8,134 (33.67)         | 0.8%   |
| Peripheral vascular disease       | 1,402 (5.19)           | 2,178 (4.02)          | 5.6%  | 1,242 (5.14)           | 1,251 (5.18)          | 0.2%   |
| Heart failure                     | 2,205 (8.17)           | 1,963 (3.63)          | 19.4% | 1,661 (6.88)           | 1,662 (6.88)          | <0.001 |
| Cerebrovascular diseases          | 5,811 (21.53)          | 11,400 (21.06)        | 1.2%  | 5,247 (21.72)          | 5,316 (22.01)         | 0.7%   |
| Chronic lung disease              | 3,750 (13.90)          | 7,335 (13.55)         | 1.0%  | 3,387 (14.02)          | 3,424 (14.18)         | 0.4%   |
| Moderate or severe kidney disease | 1,169 (4.33)           | 2,152 (3.98)          | 1.8%  | 1,061 (4.39)           | 1,100 (4.55)          | 0.8%   |
| Moderate or severe liver disease  | 754 (2.79)             | 1,212 (2.24)          | 3.5%  | 650 (2.69)             | 658 (2.72)            | 0.2%   |
| Other cancers                     | 1,750 (6.48)           | 3,846 (7.10)          | 2.5%  | 1,607 (6.65)           | 1,625 (6.73)          | 0.3%   |
| <b>Antidiabetic drugs, N (%)</b>  |                        |                       |       |                        |                       |        |
| Metformin                         | 17,420 (64.55)         | 30,827 (56.95)        | 15.6% | 15,199 (62.92)         | 15,320 (63.42)        | 1.0%   |
| Insulin                           | 12,191 (45.17)         | 22,753 (42.03)        | 6.3%  | 10,506 (43.49)         | 10,547 (43.66)        | 0.3%   |
| GLP1RA                            | 2,862 (10.60)          | 591 (1.09)            | 41.4% | 625 (2.59)             | 591 (2.45)            | 0.9%   |
| Sulfonylurea                      | 8,573 (31.77)          | 17,515 (32.35)        | 1.3%  | 7,773 (32.18)          | 7,897 (32.69)         | 1.1%   |
| Glinide                           | 3,160 (11.71)          | 7,514 (13.88)         | 6.5%  | 2,859 (11.84)          | 2,908 (12.04)         | 0.6%   |
| α-glucosidase inhibitor           | 9,958 (36.90)          | 21,510 (39.73)        | 5.8%  | 8,901 (36.85)          | 8,975 (37.16)         | 0.6%   |
| Thiazolidinedione                 | 5,594 (20.73)          | 8,222 (15.19)         | 14.5% | 4,795 (19.85)          | 4,931 (20.41)         | 1.4%   |
| <b>Medications, N (%)</b>         |                        |                       |       |                        |                       |        |
| ACEI                              | 4,997 (18.52)          | 6,813 (12.59)         | 16.4% | 4,283 (17.73)          | 4,294 (17.78)         | 0.1%   |
| ARB                               | 13,570 (50.28)         | 20,426 (37.73)        | 25.5% | 11,736 (48.59)         | 11,790 (48.81)        | 0.4%   |
| CCB                               | 13,284 (49.22)         | 22,182 (40.98)        | 16.6% | 11,665 (48.29)         | 11,797 (48.84)        | 1.1%   |
| α/β-blockers                      | 12,237 (45.34)         | 17,822 (32.92)        | 25.7% | 10,594 (43.86)         | 10,693 (44.27)        | 0.8%   |
| Diuretic                          | 9,194 (34.07)          | 14,256 (26.33)        | 16.9% | 7,971 (33.00)          | 7,984 (33.05)         | 0.1%   |
| Statin                            | 15,778 (58.46)         | 25,215 (46.58)        | 24.0% | 13,705 (56.74)         | 13,852 (57.35)        | 1.2%   |
| Fibrate                           | 2,756 (10.21)          | 3,869 (7.15)          | 10.9% | 2,284 (9.46)           | 2,283 (9.45)          | <0.001 |
| Aspirin                           | 12,394 (45.92)         | 19,275 (35.61)        | 21.1% | 10,777 (44.62)         | 10,917 (45.20)        | 1.2%   |
| Other antiplatelet drugs          | 9,238 (34.23)          | 12,254 (22.64)        | 25.9% | 7,985 (33.06)          | 8,015 (33.18)         | 0.3%   |
| NSAID                             | 10,399 (38.53)         | 19,863 (36.69)        | 3.8%  | 9,241 (38.26)          | 9,355 (38.73)         | 1.0%   |
| 5α-reductase inhibitor            | 1,362 (5.05)           | 3,458 (6.39)          | 5.8%  | 1,266 (5.24)           | 1,314 (5.44)          | 0.9%   |

Notes: PS-matched cohort, propensity score matched cohort; SGLT2i, sodium-glucose cotransporter-2 inhibitor; SMD, standardized mean difference.

Supplementary Table 3. Selection of genetic instruments that proving SGLT2 Related to STAR Methods

| Tissue                               | Gene name | ENSGID             | Phenotype                                             | Variant ID | Effect of Other | Effect allele | Beta  | Se     | P     | N        | beta_mr | se_mr  | MR and colocalization of SLC5A2 expression on HbA1c |          |         |                |      |       |
|--------------------------------------|-----------|--------------------|-------------------------------------------------------|------------|-----------------|---------------|-------|--------|-------|----------|---------|--------|-----------------------------------------------------|----------|---------|----------------|------|-------|
|                                      |           |                    |                                                       |            |                 |               |       |        |       |          |         |        | beta_mr                                             | se_mr    | colocal | pass1D.check   |      |       |
| Lung                                 | SLC5A2    | ENSG00000140675.12 | Lung_SLC5A2_r9994336                                  | r9994336   | A               | G             | 0.252 | 0.522  | 0.045 | 2.85E-27 | 515     | -0.021 | 0.005                                               | 1.89E-05 | TRUE    | r11150626_C_T  | 99%  | TRUE  |
| Stomach                              | SLC5A2    | ENSG00000140675.12 | Stomach_SLC5A2_r19497199                              | r19497199  | T               | C             | 0.415 | 0.556  | 0.070 | 6.79E-14 | 324     | -0.021 | 0.004                                               | 5.98E-07 | TRUE    | r135846922_C_G | 99%  | TRUE  |
| Artery_Tibial                        | SLC5A2    | ENSG00000140675.12 | Artery_Tibial_SLC5A2_r11644054                        | r11644054  | C               | G             | 0.414 | -0.368 | 0.046 | 9.13E-14 | 584     | -0.006 | 0.006                                               | 3.09E-01 | FALSE   | NA             | NA   | FALSE |
| Pancreas                             | SLC5A2    | ENSG00000140675.12 | Pancreas_SLC5A2_r9994336                              | r9994336   | A               | G             | 0.267 | 0.566  | 0.074 | 4.24E-13 | 305     | -0.021 | 0.005                                               | 1.89E-05 | TRUE    | r11150626_C_T  | 99%  | TRUE  |
| Colon_Sigmoid                        | SLC5A2    | ENSG00000140675.12 | Colon_Sigmoid_SLC5A2_r11150624                        | r11150624  | T               | C             | 0.442 | -0.427 | 0.060 | 1.23E-11 | 318     | -0.005 | 0.005                                               | 3.69E-01 | FALSE   | NA             | NA   | FALSE |
| Colon_Transverse                     | SLC5A2    | ENSG00000140675.12 | Colon_Transverse_SLC5A2_r11865895                     | r11865895  | C               | T             | 0.315 | 0.435  | 0.065 | 1.60E-10 | 368     | -0.024 | 0.006                                               | 1.34E-05 | TRUE    | r16656335_C_C  | 99%  | TRUE  |
| Whole_blood                          | SLC5A2    | ENSG00000140675.12 | Whole_blood_SLC5A2_r5665236                           | r5665236   | T               | A             | 0.249 | 0.084  | 0.014 | 9.86E-10 | 31191   | -0.129 | 0.030                                               | 2.27E-05 | TRUE    | r13894739_C_C  | 100% | TRUE  |
| Brain_Cerebellum                     | SLC5A2    | ENSG00000140675.12 | Brain_Cerebellum_SLC5A2_r8057029                      | r8057029   | C               | A             | 0.699 | -0.420 | 0.077 | 1.80E-07 | 209     | 0.019  | 0.006                                               | 1.29E-03 | TRUE    | r282692853_A_C | 48%  | FALSE |
| Brain_Frontal_Cortex_BA9             | SLC5A2    | ENSG00000140675.12 | Brain_Frontal_Cortex_BA9_SLC5A2_r11150606             | r11150606  | C               | T             | 0.011 | -2.259 | 0.491 | 9.51E-06 | 175     | -0.021 | 0.004                                               | 8.77E-01 | FALSE   | NA             | NA   | FALSE |
| Artery_Aorta                         | SLC5A2    | ENSG00000140675.12 | Artery_Aorta_SLC5A2_r140791727                        | r140791727 | T               | C             | 0.008 | 1.661  | 0.371 | 1.04E-05 | 387     | -0.012 | 0.008                                               | 1.05E-01 | FALSE   | NA             | NA   | FALSE |
| Esophagus_Gastroesophageal_Junction  | SLC5A2    | ENSG00000140675.12 | Esophagus_Gastroesophageal_Junction_SLC5A2_r11643752  | r11643752  | A               | G             | 0.414 | -0.261 | 0.059 | 1.52E-05 | 330     | 0.003  | 0.009                                               | 7.12E-01 | FALSE   | NA             | NA   | FALSE |
| Brain_Cortex                         | SLC5A2    | ENSG00000140675.12 | Brain_Cortex_SLC5A2_r11244975                         | r11244975  | T               | C             | 0.044 | 0.996  | 0.223 | 2.36E-05 | 205     | 0.019  | 0.006                                               | 1.68E-03 | TRUE    | NA             | NA   | FALSE |
| Brain_Cerebellar_Hemisphere          | SLC5A2    | ENSG00000140675.12 | Brain_Cerebellar_Hemisphere_SLC5A2_r8054784           | r8054784   | C               | T             | 0.583 | -0.332 | 0.078 | 3.45E-05 | 175     | 0.005  | 0.007                                               | 4.92E-01 | FALSE   | r11644104_C_T  | NA   | FALSE |
| Prostate                             | SLC5A2    | ENSG00000140675.12 | Prostate_SLC5A2_r561482                               | r561482    | G               | A             | 0.643 | 0.350  | 0.083 | 4.03E-05 | 221     | -0.011 | 0.007                                               | 9.38E-02 | FALSE   | NA             | NA   | FALSE |
| Brain_Hypothalamus                   | SLC5A2    | ENSG00000140675.12 | Brain_Hypothalamus_SLC5A2_r138759654                  | r138759654 | A               | C             | 0.012 | 1.477  | 0.353 | 5.08E-05 | 170     | -0.009 | 0.007                                               | 1.95E-01 | FALSE   | NA             | NA   | FALSE |
| Skin_Not_Sun_Exposed_Suprapubic      | SLC5A2    | ENSG00000140675.12 | Skin_Not_Sun_Exposed_Suprapubic_SLC5A2_r14011509      | r14011509  | C               | T             | 0.017 | 0.955  | 0.240 | 7.86E-05 | 517     | NA     | NA                                                  | NA       | FALSE   | NA             | NA   | FALSE |
| Adipose_Subcutaneous                 | SLC5A2    | ENSG00000140675.12 | Adipose_Subcutaneous_SLC5A2_r3841244                  | r3841244   | G               | GT            | 0.528 | 0.211  | 0.051 | 8.93E-05 | 581     | NA     | NA                                                  | NA       | FALSE   | NA             | NA   | FALSE |
| Brain_Signal_Cond_Cervical_C1        | SLC5A2    | ENSG00000140675.12 | Brain_Signal_Cond_Cervical_C1_SLC5A2_r12073918        | r12073918  | G               | C             | 0.119 | 0.737  | 0.185 | 1.33E-04 | 126     | -0.003 | 0.006                                               | 6.19E-01 | FALSE   | NA             | NA   | FALSE |
| Skin_Sun_Exposed_Lower_Ing           | SLC5A2    | ENSG00000140675.12 | Skin_Sun_Exposed_Lower_Ing_SLC5A2_r8058958            | r8058958   | A               | G             | 0.014 | 0.815  | 0.212 | 1.35E-04 | 605     | NA     | NA                                                  | NA       | FALSE   | NA             | NA   | FALSE |
| Uterus                               | SLC5A2    | ENSG00000140675.12 | Uterus_SLC5A2_r35445454                               | r35445454  | T               | C             | 0.275 | 0.430  | 0.109 | 1.00E-04 | 129     | -0.030 | 0.006                                               | 1.24E-07 | TRUE    | r113138456_G_A | 81%  | TRUE  |
| Ovary                                | SLC5A2    | ENSG00000140675.12 | Ovary_SLC5A2_r17923411                                | r17923411  | TGGGGG          | T             | 0.018 | 1.347  | 0.364 | 2.08E-04 | 167     | NA     | NA                                                  | NA       | FALSE   | NA             | NA   | FALSE |
| Spleen                               | SLC5A2    | ENSG00000140675.12 | Spleen_SLC5A2_r8044603                                | r8044603   | G               | A             | 0.313 | 0.379  | 0.101 | 2.71E-04 | 227     | 0.009  | 0.007                                               | 2.24E-01 | FALSE   | NA             | NA   | FALSE |
| Adipose_Visceral_Omentum             | SLC5A2    | ENSG00000140675.12 | Adipose_Visceral_Omentum_SLC5A2_r4488457              | r4488457   | G               | T             | 0.682 | 0.239  | 0.065 | 2.72E-04 | 469     | -0.055 | 0.011                                               | 2.90E-07 | TRUE    | r17205195_A_G  | 100% | TRUE  |
| Breast_Mammary_Tissue                | SLC5A2    | ENSG00000140675.12 | Breast_Mammary_Tissue_SLC5A2_r144959592               | r144959592 | G               | A             | 0.016 | -0.780 | 0.219 | 4.19E-04 | 396     | 0.016  | 0.012                                               | 1.82E-01 | FALSE   | NA             | NA   | FALSE |
| Esophagus_Muscle                     | SLC5A2    | ENSG00000140675.12 | Esophagus_Muscle_SLC5A2_r17279669                     | r17279669  | T               | C             | 0.044 | -0.436 | 0.149 | 6.13E-04 | 497     | 0.018  | 0.012                                               | 1.51E-01 | FALSE   | NA             | NA   | FALSE |
| Esophagus_Muscularis                 | SLC5A2    | ENSG00000140675.12 | Esophagus_Muscularis_SLC5A2_r34235897                 | r34235897  | C               | CT            | 0.123 | -0.270 | 0.078 | 6.41E-04 | 465     | NA     | NA                                                  | NA       | FALSE   | NA             | NA   | FALSE |
| Thyroid                              | SLC5A2    | ENSG00000140675.12 | Thyroid_SLC5A2_r78941771                              | r78941771  | T               | C             | 0.019 | -0.462 | 0.137 | 7.63E-04 | 574     | -0.005 | 0.014                                               | 7.33E-01 | FALSE   | NA             | NA   | FALSE |
| Brain_Caudate_basal_ganglia          | SLC5A2    | ENSG00000140675.12 | Brain_Caudate_basal_ganglia_SLC5A2_r529028063         | r529028063 | CT              | C             | 0.013 | 1.571  | 0.461 | 8.90E-04 | 194     | 0.005  | 0.007                                               | 4.81E-01 | FALSE   | NA             | NA   | FALSE |
| Brain_Hippocampus                    | SLC5A2    | ENSG00000140675.12 | Brain_Hippocampus_SLC5A2_r116872173                   | r116872173 | T               | C             | 0.021 | 1.118  | 0.330 | 9.54E-04 | 165     | -0.034 | 0.011                                               | 1.37E-03 | TRUE    | r4889830_C_C   | 4%   | FALSE |
| Brain_Nucleus_acumbens_basal_ganglia | SLC5A2    | ENSG00000140675.12 | Brain_Nucleus_acumbens_basal_ganglia_SLC5A2_r11721970 | r11721970  | G               | T             | 0.050 | 0.711  | 0.212 | 1.00E-03 | 202     | -0.012 | 0.012                                               | 2.87E-01 | FALSE   | NA             | NA   | FALSE |
| Brain_Substantia_nigra               | SLC5A2    | ENSG00000140675.12 | Brain_Substantia_nigra_SLC5A2_r17008790               | r17008790  | T               | A             | 0.022 | -1.223 | 0.360 | 1.09E-03 | 114     | -0.002 | 0.008                                               | 7.95E-01 | FALSE   | NA             | NA   | FALSE |
| Artery_Coronary                      | SLC5A2    | ENSG00000140675.12 | Artery_Coronary_SLC5A2_r8057326                       | r8057326   | C               | T             | 0.484 | 0.267  | 0.082 | 1.42E-03 | 213     | -0.011 | 0.009                                               | 2.80E-04 | TRUE    | r34742827_C_C  | 79%  | TRUE  |
| Whole_Blood                          | SLC5A2    | ENSG00000140675.12 | Whole_Blood_SLC5A2_r41476751                          | r41476751  | C               | T             | 0.216 | -0.183 | 0.058 | 1.57E-03 | 670     | 0.008  | 0.018                                               | 6.56E-01 | FALSE   | NA             | NA   | FALSE |
| Nerve_Tibial                         | SLC5A2    | ENSG00000140675.12 | Nerve_Tibial_SLC5A2_r9930811                          | r9930811   | G               | A             | 0.388 | 0.188  | 0.060 | 1.80E-03 | 532     | -0.017 | 0.013                                               | 8.68E-01 | TRUE    | r17199385_C_T  | 100% | TRUE  |
| Brain_Amygdala                       | SLC5A2    | ENSG00000140675.12 | Brain_Amygdala_SLC5A2_r86900824                       | r86900824  | C               | A             | 0.012 | -1.743 | 0.549 | 1.97E-03 | 129     | NA     | NA                                                  | NA       | FALSE   | NA             | NA   | FALSE |
| Liver                                | SLC5A2    | ENSG00000140675.12 | Liver_SLC5A2_r14213957                                | r14213957  | A               | G             | 0.007 | 1.557  | 0.502 | 2.26E-03 | 208     | 0.010  | 0.006                                               | 7.10E-02 | FALSE   | NA             | NA   | FALSE |
| Minor_Salivary_Gland                 | SLC5A2    | ENSG00000140675.12 | Minor_Salivary_Gland_SLC5A2_r11642535                 | r11642535  | A               | C             | 0.097 | 0.930  | 0.174 | 2.86E-03 | 144     | -0.018 | 0.007                                               | 5.35E-03 | TRUE    | r59933843_C_C  | 26%  | FALSE |
| Brain_Putamen_basal_ganglia          | SLC5A2    | ENSG00000140675.12 | Brain_Putamen_basal_ganglia_SLC5A2_r17374021          | r17374021  | GCTC            | G             | 0.559 | -0.355 | 0.118 | 3.13E-03 | 170     | -0.047 | 0.007                                               | 4.91E-13 | TRUE    | NA             | NA   | FALSE |
| Vagina                               | SLC5A2    | ENSG00000140675.12 | Vagina_SLC5A2_r17785569                               | r17785569  | T               | C             | 0.082 | -0.531 | 0.176 | 3.24E-03 | 141     | -0.017 | 0.006                                               | 6.46E-03 | TRUE    | r11574632_C_C  | 46%  | FALSE |
| Pituitary                            | SLC5A2    | ENSG00000140675.12 | Pituitary_SLC5A2_r111800966                           | r111800966 | G               | A             | 0.023 | -0.059 | 0.223 | 3.47E-03 | 237     | 0.000  | 0.010                                               | 9.86E-01 | FALSE   | NA             | NA   | FALSE |
| Small_Intestine_Terminal_ileum       | SLC5A2    | ENSG00000140675.12 | Small_Intestine_Terminal_ileum_SLC5A2_r117391625      | r117391625 | T               | C             | 0.078 | -0.372 | 0.128 | 4.22E-03 | 174     | 0.005  | 0.011                                               | 6.22E-01 | FALSE   | NA             | NA   | FALSE |
| Brain_Anterior_cingulate_cortex_BA24 | SLC5A2    | ENSG00000140675.12 | Brain_Anterior_cingulate_cortex_BA24_SLC5A2_r4613077  | r4613077   | A               | C             | 0.017 | -1.200 | 0.430 | 6.13E-03 | 147     | NA     | NA                                                  | NA       | FALSE   | NA             | NA   | FALSE |
| Cells_Cultured_Fibroblasts           | SLC5A2    | ENSG00000140675.12 | Cells_Cultured_Fibroblasts_SLC5A2_r76378239           | r76378239  | T               | C             | 0.009 | 0.620  | 0.233 | 6.94E-03 | 483     | -0.014 | 0.014                                               | 1.35E-02 | TRUE    | r11644104_C_T  | 7%   | FALSE |
| Testis                               | SLC5A2    | ENSG00000140675.12 | Testis_SLC5A2_r59530358                               | r59530358  | C               | GCT           | 0.717 | 0.086  | 0.032 | 7.83E-03 | 322     | NA     | NA                                                  | NA       | FALSE   | NA             | NA   | FALSE |

Notes: 1. After instrument selection, eight variants for nine gene-tissue combination passed the selection process. After LD clumping of these eight variants with r<sup>2</sup><0.1, two variants were kept as primary instruments (listed in Table 53)

Notes: 2. Tissue, Gene name, ENSGID and Phenotype are the expression levels of a gene in a specific tissue that had been probed by the genetic instruments. Variant ID, CHR and Position are the ID of the genetic variant. Effect allele, other allele, effect allele freq, beta, SE, N and P are the genetic association information of the genetic variant on the exposure. Beta, se, mr, pval, mr are the effect, standard error and p value of the MR analysis of SGLT2 on HbA1c. HbA1c-signal-in-region, LD-r<sup>2</sup> and Colocal are the approximate colocalization that had been conducted between expression of SLC5A2 gene and HbA1c.

**Supplementary Table 4. Genetic instruments been selected to proxy SGLT2 inhibition and HbA1c levels (data from MAGIC consortium). Related to STAR Methods**

| Phenotype       | SNP       | Effect_allele | Other_allele | effect_allele_freq | Beta   | Se    | P        | N      | maf   | r2 - variance e | Sum_r2   | N_SNPs | F-statistics |
|-----------------|-----------|---------------|--------------|--------------------|--------|-------|----------|--------|-------|-----------------|----------|--------|--------------|
| SGLT2 MAGIC new | rs8050500 | C             | T            | 0.467              | -0.043 | 0.009 | 1.56E-06 | 128609 | 0.467 | 9.06E-04        | 9.06E-04 | 2      | 58.295       |

Notes: Phenotype is the exposure that been proxied by the genetic instruments. id.phenotype is the IEU OpenGWAS database ID of the outcome. Variant ID, CHR and Position are the ID, chromosome and position of the genetic variant. Effect allele, other allele, effect allele freq, beta, SE, N and P are the genetic association information of the genetic variant on the exposure.



Supplementary Table 5. Characteristics of outcome data been used in this study. Related to STAR Methods

| Outcome data information                                |                |                   |                    |                             |            |         |            |         |
|---------------------------------------------------------|----------------|-------------------|--------------------|-----------------------------|------------|---------|------------|---------|
| MR-phenotype name                                       | Purpose        | IEU-OpenGWASdb-ID | Case group         | Control group               | GWAS Model | n_cases | n_controls | n_total |
| Total prostate cancer                                   | PrCa risk      | ieu-b-85          | All PrCa cases     | Non-PrCa controls           | Logistic   | 79148   | 61106      | 140254  |
| Advanced prostate cancer                                | PrCa risk      | ieu-a-1238        | Advanced PrCa      | Non-PrCa controls           | Logistic   | 15167   | 58308      | 73475   |
| Early-onset prostate cancer                             | PrCa risk      | ieu-a-1240        | PrCa Age at Dx<=55 | Non-PrCa controls           | Logistic   | 6988    | 44256      | 51244   |
| High vs low aggressive prostate cancer                  | PrCa risk      | ieu-a-1243        | High aggressive    | Low aggressive              | Logistic   | 15561   | 9739       | 25300   |
| High vs low and intermediate aggressive prostate cancer | PrCa risk      | ieu-a-1244        | High aggressive    | Low/intermediate aggressive | Logistic   | 20658   | 38093      | 58751   |
| Advanced vs non-advanced prostate cancer                | PrCa risk      | ieu-a-1241        | Advanced PrCa      | Non Advanced PrCa           | Logistic   | 14160   | 62421      | 76581   |
| Gleason score                                           | PrCa risk      | ieu-a-1242        | Continuous score   | /                           | Linear     | /       | /          | 61978   |
| PSA levels                                              | PrCa diagnosis | /                 | Continuous level   | /                           | Linear     | /       | /          | 95768   |
| Type 2 diabetes                                         | Validation     | Mahajan 2018      | Type 2 diabetes    | /                           | Logistic   | 14160   | 62421      | 76581   |

\* low aggressive: T stage from the TNM staging<=T1, and Gleason score (GS)<=6, and PSA<10;  
 \*\* intermediate aggressive: T stage: T2, and GS=7, and PSA 10~20;  
 \*\*\* high aggressive: T stage: T3/T4 or N1 or M1 or GS>=8 or PSA>20;  
 # advanced: Metastatic disease or GS>=8 or PSA>100 or PrCa Death.

Supplementary Table 6. Mendelian randomization estimates of SGLT2 on prostate cancer using seven instruments selected from UK Biobank. Related to STAR Methods

| exposure                | outcome                                                 | method                    | nmp | b      | se    | ICI    | UCI    | pval  | Q      | Q <sub>df</sub> | O <sub>pval</sub> | egger  | Interc | se    | pval  | OR    | LCI    | UCI |
|-------------------------|---------------------------------------------------------|---------------------------|-----|--------|-------|--------|--------|-------|--------|-----------------|-------------------|--------|--------|-------|-------|-------|--------|-----|
| SGLT2 conventional male | Advanced prostate cancer                                | MR Egger                  | 7   | 1.866  | 0.939 | 0.025  | 3.707  | 0.104 | 4.029  | 5               | 0.545             | -0.028 | 0.020  | 0.226 | 1.155 | 0.025 | 0.875  |     |
| SGLT2 conventional male | Advanced prostate cancer                                | Weighted median           | 7   | 0.660  | 0.420 | -0.163 | 1.483  | 0.116 | NA     | NA              | NA                | NA     | NA     | NA    | 0.517 | 0.227 | 1.177  |     |
| SGLT2 conventional male | Advanced prostate cancer                                | Inverse variance weighted | 7   | 0.655  | 0.332 | 0.003  | 1.306  | 0.049 | 5.931  | 6               | 0.431             | NA     | NA     | NA    | 0.519 | 0.271 | 0.997  |     |
| SGLT2 conventional male | Advanced prostate cancer                                | Simple mode               | 7   | 0.533  | 0.664 | -0.769 | 1.834  | 0.453 | NA     | NA              | NA                | NA     | NA     | NA    | 0.587 | 0.160 | 2.158  |     |
| SGLT2 conventional male | Advanced prostate cancer                                | Weighted mode             | 7   | 0.625  | 0.465 | -0.287 | 1.537  | 0.228 | NA     | NA              | NA                | NA     | NA     | NA    | 0.535 | 0.215 | 1.332  |     |
| SGLT2 conventional male | Advanced prostate cancer                                | gIVW                      | 7   | 0.739  | 0.384 | -0.014 | 1.492  | 0.054 | 4.974  | 6               | 0.547             | NA     | NA     | NA    | 0.477 | 0.215 | 1.014  |     |
| SGLT2 conventional male | Early-onset prostate cancer                             | MR Egger                  | 7   | 0.652  | 1.386 | -2.065 | 3.369  | 0.658 | 4.197  | 5               | 0.521             | 0.015  | 0.030  | 0.641 | 0.521 | 0.034 | 7.883  |     |
| SGLT2 conventional male | Early-onset prostate cancer                             | Weighted median           | 7   | 0.792  | 0.645 | -0.473 | 2.057  | 0.220 | NA     | NA              | NA                | NA     | NA     | NA    | 0.453 | 0.128 | 1.604  |     |
| SGLT2 conventional male | Early-onset prostate cancer                             | Inverse variance weighted | 7   | 1.296  | 0.488 | 0.339  | 2.252  | 0.008 | 4.443  | 6               | 0.617             | NA     | NA     | NA    | 0.274 | 0.105 | 0.712  |     |
| SGLT2 conventional male | Early-onset prostate cancer                             | Simple mode               | 7   | 0.869  | 0.943 | -0.978 | 2.717  | 0.332 | NA     | NA              | NA                | NA     | NA     | NA    | 0.419 | 0.066 | 2.660  |     |
| SGLT2 conventional male | Early-onset prostate cancer                             | Weighted mode             | 7   | 0.799  | 0.676 | -0.526 | 2.123  | 0.282 | NA     | NA              | NA                | NA     | NA     | NA    | 0.450 | 0.120 | 1.692  |     |
| SGLT2 conventional male | Early-onset prostate cancer                             | gIVW                      | 7   | 1.090  | 0.563 | -0.013 | 2.193  | 0.053 | 5.271  | 6               | 0.509             | NA     | NA     | NA    | 0.336 | 0.112 | 1.014  |     |
| SGLT2 conventional male | Advanced vs non-advanced prostate cancer                | MR Egger                  | 7   | 2.502  | 0.947 | 0.645  | 4.359  | 0.046 | 4.280  | 5               | 0.510             | -0.054 | 0.020  | 0.045 | 0.082 | 0.013 | 0.524  |     |
| SGLT2 conventional male | Advanced vs non-advanced prostate cancer                | Weighted median           | 7   | 0.703  | 0.445 | -0.169 | 1.576  | 0.114 | NA     | NA              | NA                | NA     | NA     | NA    | 0.495 | 0.207 | 1.185  |     |
| SGLT2 conventional male | Advanced vs non-advanced prostate cancer                | Inverse variance weighted | 7   | 0.148  | 0.461 | -0.756 | 1.052  | 0.749 | 11.343 | 6               | 0.078             | NA     | NA     | NA    | 0.863 | 0.249 | 2.130  |     |
| SGLT2 conventional male | Advanced vs non-advanced prostate cancer                | Simple mode               | 7   | -0.588 | 0.732 | -2.023 | 0.847  | 0.453 | NA     | NA              | NA                | NA     | NA     | NA    | 1.800 | 0.429 | 7.563  |     |
| SGLT2 conventional male | Advanced vs non-advanced prostate cancer                | Weighted mode             | 7   | 0.755  | 0.477 | -0.179 | 1.690  | 0.164 | NA     | NA              | NA                | NA     | NA     | NA    | 0.470 | 0.185 | 1.196  |     |
| SGLT2 conventional male | Advanced vs non-advanced prostate cancer                | gIVW                      | 7   | 0.296  | 0.474 | -0.634 | 1.226  | 0.533 | 8.987  | 6               | 0.174             | NA     | NA     | NA    | 0.744 | 0.294 | 1.885  |     |
| SGLT2 conventional male | Gleason score                                           | MR Egger                  | 7   | 0.602  | 0.408 | -0.198 | 1.402  | 0.200 | 4.984  | 5               | 0.418             | -0.016 | 0.009  | 0.137 | NA    | NA    | NA     |     |
| SGLT2 conventional male | Gleason score                                           | Weighted median           | 7   | 0.090  | 0.192 | -0.286 | 0.465  | 0.640 | NA     | NA              | NA                | NA     | NA     | NA    | NA    | NA    | NA     |     |
| SGLT2 conventional male | Gleason score                                           | Inverse variance weighted | 7   | -0.072 | 0.169 | -0.404 | 0.260  | 0.671 | 8.106  | 6               | 0.230             | NA     | NA     | NA    | NA    | NA    | NA     |     |
| SGLT2 conventional male | Gleason score                                           | Simple mode               | 7   | -0.038 | 0.286 | -0.598 | 0.522  | 0.898 | NA     | NA              | NA                | NA     | NA     | NA    | NA    | NA    | NA     |     |
| SGLT2 conventional male | Gleason score                                           | Weighted mode             | 7   | 0.124  | 0.188 | -0.245 | 0.493  | 0.535 | NA     | NA              | NA                | NA     | NA     | NA    | NA    | NA    | NA     |     |
| SGLT2 conventional male | Gleason score                                           | gIVW                      | 7   | -0.052 | 0.171 | -0.387 | 0.283  | 0.763 | 6.146  | 6               | 0.407             | NA     | NA     | NA    | NA    | NA    | NA     |     |
| SGLT2 conventional male | High vs low aggressive prostate cancer                  | MR Egger                  | 7   | 0.755  | 1.660 | -2.498 | 4.008  | 0.668 | 7.465  | 5               | 0.188             | -0.021 | 0.036  | 0.592 | 0.470 | 0.018 | 12.158 |     |
| SGLT2 conventional male | High vs low aggressive prostate cancer                  | Weighted median           | 7   | 0.140  | 0.640 | -1.113 | 1.393  | 0.827 | NA     | NA              | NA                | NA     | NA     | NA    | 0.869 | 0.248 | 3.045  |     |
| SGLT2 conventional male | High vs low aggressive prostate cancer                  | Inverse variance weighted | 7   | -0.132 | 0.556 | -1.221 | 0.957  | 0.812 | 7.953  | 6               | 0.242             | NA     | NA     | NA    | 1.141 | 0.384 | 3.392  |     |
| SGLT2 conventional male | High vs low aggressive prostate cancer                  | Simple mode               | 7   | 0.170  | 1.075 | -1.937 | 2.277  | 0.880 | NA     | NA              | NA                | NA     | NA     | NA    | 0.864 | 0.103 | 6.936  |     |
| SGLT2 conventional male | High vs low aggressive prostate cancer                  | Weighted mode             | 7   | 0.339  | 0.721 | -1.075 | 1.753  | 0.655 | NA     | NA              | NA                | NA     | NA     | NA    | 0.713 | 0.173 | 2.931  |     |
| SGLT2 conventional male | High vs low aggressive prostate cancer                  | gIVW                      | 7   | -0.364 | 0.648 | -1.634 | 0.906  | 0.574 | 8.093  | 6               | 0.231             | NA     | NA     | NA    | 1.439 | 0.404 | 5.125  |     |
| SGLT2 conventional male | High vs low and intermediate aggressive prostate cancer | MR Egger                  | 7   | 1.644  | 0.883 | -0.088 | 3.375  | 0.122 | 3.432  | 5               | 0.634             | -0.029 | 0.019  | 0.183 | 0.193 | 0.034 | 1.092  |     |
| SGLT2 conventional male | High vs low and intermediate aggressive prostate cancer | Weighted median           | 7   | 0.627  | 0.411 | -0.178 | 1.432  | 0.127 | NA     | NA              | NA                | NA     | NA     | NA    | 0.534 | 0.239 | 1.195  |     |
| SGLT2 conventional male | High vs low and intermediate aggressive prostate cancer | Inverse variance weighted | 7   | 0.368  | 0.314 | -0.247 | 0.983  | 0.240 | 5.818  | 6               | 0.444             | NA     | NA     | NA    | 0.692 | 0.274 | 1.280  |     |
| SGLT2 conventional male | High vs low and intermediate aggressive prostate cancer | Simple mode               | 7   | 0.490  | 0.705 | -0.891 | 1.871  | 0.513 | NA     | NA              | NA                | NA     | NA     | NA    | 0.613 | 0.154 | 2.439  |     |
| SGLT2 conventional male | High vs low and intermediate aggressive prostate cancer | Weighted mode             | 7   | 0.647  | 0.475 | -0.283 | 1.577  | 0.222 | NA     | NA              | NA                | NA     | NA     | NA    | 0.524 | 0.207 | 1.328  |     |
| SGLT2 conventional male | High vs low and intermediate aggressive prostate cancer | gIVW                      | 7   | 0.303  | 0.363 | -0.409 | 1.015  | 0.404 | 5.333  | 6               | 0.502             | NA     | NA     | NA    | 0.739 | 0.362 | 1.505  |     |
| SGLT2 conventional male | Total prostate cancer                                   | MR Egger                  | 7   | 0.532  | 0.545 | -0.537 | 1.601  | 0.374 | 3.069  | 5               | 0.689             | 0.001  | 0.012  | 0.923 | 0.587 | 0.202 | 1.710  |     |
| SGLT2 conventional male | Total prostate cancer                                   | Weighted median           | 7   | 0.993  | 0.247 | 1.109  | 1.076  | 0.016 | NA     | NA              | NA                | NA     | NA     | NA    | 0.553 | 0.341 | 0.887  |     |
| SGLT2 conventional male | Total prostate cancer                                   | Inverse variance weighted | 7   | 0.584  | 0.194 | 0.204  | 0.964  | 0.003 | 3.079  | 6               | 0.799             | NA     | NA     | NA    | 0.647 | 0.381 | 0.815  |     |
| SGLT2 conventional male | Total prostate cancer                                   | Simple mode               | 7   | 0.435  | 0.324 | -0.199 | 1.070  | 0.227 | NA     | NA              | NA                | NA     | NA     | NA    | 0.557 | 0.343 | 1.221  |     |
| SGLT2 conventional male | Total prostate cancer                                   | Weighted mode             | 7   | 0.542  | 0.256 | 0.040  | 1.044  | 0.079 | NA     | NA              | NA                | NA     | NA     | NA    | 0.581 | 0.352 | 0.961  |     |
| SGLT2 conventional male | Total prostate cancer                                   | gIVW                      | 7   | 0.571  | 0.225 | 0.130  | 1.011  | 0.011 | 2.618  | 6               | 0.855             | NA     | NA     | NA    | 0.565 | 0.364 | 0.878  |     |
| SGLT2 conventional male | PSA levels                                              | MR Egger                  | 7   | -0.540 | 0.235 | -1.000 | -0.080 | 0.070 | 1.912  | 5               | 0.861             | 0.010  | 0.005  | 0.124 | NA    | NA    | NA     |     |
| SGLT2 conventional male | PSA levels                                              | Weighted median           | 7   | -0.125 | 0.111 | -0.342 | 0.093  | 0.263 | NA     | NA              | NA                | NA     | NA     | NA    | NA    | NA    | NA     |     |
| SGLT2 conventional male | PSA levels                                              | Inverse variance weighted | 7   | -0.137 | 0.085 | -0.304 | 0.030  | 0.107 | 5.313  | 6               | 0.504             | NA     | NA     | NA    | NA    | NA    | NA     |     |
| SGLT2 conventional male | PSA levels                                              | Simple mode               | 7   | -0.009 | 0.167 | -0.536 | 0.318  | 0.959 | NA     | NA              | NA                | NA     | NA     | NA    | NA    | NA    | NA     |     |
| SGLT2 conventional male | PSA levels                                              | Weighted mode             | 7   | -0.126 | 0.111 | -0.343 | 0.092  | 0.300 | NA     | NA              | NA                | NA     | NA     | NA    | NA    | NA    | NA     |     |
| SGLT2 conventional male | PSA levels                                              | gIVW                      | 7   | -0.132 | 0.102 | -0.331 | 0.067  | 0.195 | 6.387  | 6               | 0.381             | NA     | NA     | NA    | NA    | NA    | NA     |     |
| SGLT2 conventional male | Type 2 diabetes                                         | Inverse variance weighted | 6   | 0.422  | 0.150 | 0.128  | 0.715  | 0.005 | 3.087  | 5               | 0.687             | NA     | NA     | NA    | 0.656 | 0.489 | 0.880  |     |
| SGLT2 conventional male | Type 2 diabetes                                         | MR Egger                  | 6   | -0.150 | 0.420 | -0.974 | 0.674  | 0.739 | 0.967  | 4               | 0.915             | 0.013  | 0.009  | 0.219 | 1.162 | 0.510 | 2.649  |     |
| SGLT2 conventional male | Type 2 diabetes                                         | Weighted median           | 6   | 0.244  | 0.195 | -0.138 | 0.627  | 0.211 | NA     | NA              | NA                | NA     | NA     | NA    | 0.783 | 0.534 | 1.148  |     |
| SGLT2 conventional male | Type 2 diabetes                                         | Simple mode               | 6   | 0.263  | 0.306 | -0.336 | 0.862  | 0.429 | NA     | NA              | NA                | NA     | NA     | NA    | 0.769 | 0.422 | 1.399  |     |
| SGLT2 conventional male | Type 2 diabetes                                         | Weighted mode             | 6   | 0.256  | 0.202 | -0.141 | 0.652  | 0.262 | NA     | NA              | NA                | NA     | NA     | NA    | 0.774 | 0.521 | 1.151  |     |
| SGLT2 conventional male | Type 2 diabetes                                         | gIVW                      | 6   | 0.271  | 0.245 | -0.208 | 0.751  | 0.268 | 7.673  | 4               | 0.175             | NA     | NA     | NA    | 0.762 | 0.472 | 1.232  |     |

Notes: the conventional instrument selection process refers to seven genetic variants robustly associated with HbA1c (P<5e-8) in the SLCS42 region. nmp means the number of instruments been used in the MR analysis. Method is the MR method been used in the analysis. Beta, se, pval, CI, LB

Supplementary Table 7. Mendelian randomization estimates of SGLT2 on prostate cancer based on the instruments selected either using a stringent selection process or from MAGIC data. Related to STAR Methods

| exposure        | outcome                                                 | method     | n SNP | b      | se    | lci    | uci   | pval  | Q     | Q_df | Q_pval | egger | interc | se | pval  | OR    | LCI    | UCI |
|-----------------|---------------------------------------------------------|------------|-------|--------|-------|--------|-------|-------|-------|------|--------|-------|--------|----|-------|-------|--------|-----|
| SGLT2 ukbb male | Advanced prostate cancer                                | IVW        | 2     | 1.375  | 0.702 | 0.000  | 2.750 | 0.050 | 0.047 | 1    | 0.829  | NA    | NA     | NA | 0.253 | 0.064 | 1.000  |     |
| SGLT2 ukbb male | Advanced prostate cancer                                | gIVW       | 2     | 1.401  | 0.785 | -0.138 | 2.940 | 0.074 | 0.064 | 1    | 0.800  | NA    | NA     | NA | 0.246 | 0.053 | 1.147  |     |
| SGLT2 ukbb male | Early-onset prostate cancer                             | IVW        | 2     | 0.591  | 1.757 | -2.853 | 4.034 | 0.737 | 2.947 | 1    | 0.086  | NA    | NA     | NA | 0.554 | 0.018 | 17.334 |     |
| SGLT2 ukbb male | Early-onset prostate cancer                             | gIVW       | 2     | 0.287  | 1.146 | -1.958 | 2.532 | 0.802 | 4.063 | 1    | 0.044  | NA    | NA     | NA | 0.750 | 0.079 | 7.087  |     |
| SGLT2 ukbb male | Advanced vs non-advanced prostate cancer                | IVW        | 2     | -0.085 | 0.709 | -1.475 | 1.306 | 0.905 | 0.182 | 1    | 0.669  | NA    | NA     | NA | 1.088 | 0.271 | 4.371  |     |
| SGLT2 ukbb male | Advanced vs non-advanced prostate cancer                | gIVW       | 2     | -0.033 | 0.794 | -1.590 | 1.524 | 0.967 | 0.252 | 1    | 0.616  | NA    | NA     | NA | 1.033 | 0.218 | 4.902  |     |
| SGLT2 ukbb male | Gleason score                                           | IVW        | 2     | 0.132  | 0.310 | -0.476 | 0.740 | 0.670 | 0.853 | 1    | 0.356  | NA    | NA     | NA | 0.876 | 0.477 | 1.609  |     |
| SGLT2 ukbb male | Gleason score                                           | gIVW       | 2     | 0.179  | 0.348 | -0.503 | 0.861 | 0.607 | 1.182 | 1    | 0.277  | NA    | NA     | NA | 0.836 | 0.423 | 1.654  |     |
| SGLT2 ukbb male | High vs low aggressive prostate cancer                  | IVW        | 2     | 0.830  | 1.061 | -1.250 | 2.911 | 0.434 | 1.070 | 1    | 0.301  | NA    | NA     | NA | 0.436 | 0.054 | 3.489  |     |
| SGLT2 ukbb male | High vs low aggressive prostate cancer                  | gIVW       | 2     | 0.654  | 1.151 | -1.601 | 2.910 | 0.570 | 1.480 | 1    | 0.224  | NA    | NA     | NA | 0.520 | 0.055 | 4.958  |     |
| SGLT2 ukbb male | High vs low and intermediate aggressive prostate cancer | IVW        | 2     | -0.037 | 0.665 | -1.341 | 1.266 | 0.955 | 0.031 | 1    | 0.851  | NA    | NA     | NA | 1.038 | 0.282 | 3.821  |     |
| SGLT2 ukbb male | High vs low and intermediate aggressive prostate cancer | gIVW       | 2     | -0.018 | 0.745 | -1.479 | 1.443 | 0.981 | 0.042 | 1    | 0.837  | NA    | NA     | NA | 1.018 | 0.236 | 4.387  |     |
| SGLT2 ukbb male | Total prostate cancer                                   | IVW        | 2     | 1.240  | 0.410 | 0.436  | 2.044 | 0.002 | 0.077 | 1    | 0.782  | NA    | NA     | NA | 0.289 | 0.129 | 0.646  |     |
| SGLT2 ukbb male | Total prostate cancer                                   | gIVW       | 2     | 1.221  | 0.459 | 0.320  | 2.122 | 0.008 | 0.106 | 1    | 0.745  | NA    | NA     | NA | 0.295 | 0.120 | 0.726  |     |
| SGLT2 ukbb male | PSA levels                                              | IVW        | 2     | -0.150 | 0.195 | -0.532 | 0.232 | 0.442 | 0.411 | 1    | 0.521  | NA    | NA     | NA | 1.162 | 0.793 | 1.702  |     |
| SGLT2 ukbb male | PSA levels                                              | gIVW       | 2     | -0.164 | 0.221 | -0.597 | 0.268 | 0.456 | 0.580 | 1    | 0.446  | NA    | NA     | NA | 1.179 | 0.765 | 1.816  |     |
| SGLT2_MAGIC     | Advanced prostate cancer                                | Wald ratio | 1     | 0.898  | 0.351 | 0.209  | 1.586 | 0.011 | NA    | NA   | NA     | NA    | NA     | NA | 0.408 | 0.205 | 0.811  |     |
| SGLT2_MAGIC     | Early-onset prostate cancer                             | Wald ratio | 1     | 0.372  | 0.516 | -0.640 | 1.384 | 0.471 | NA    | NA   | NA     | NA    | NA     | NA | 0.689 | 0.251 | 1.896  |     |
| SGLT2_MAGIC     | Advanced vs non-advanced prostate cancer                | Wald ratio | 1     | 0.712  | 0.356 | 0.014  | 1.409 | 0.046 | NA    | NA   | NA     | NA    | NA     | NA | 0.491 | 0.244 | 0.986  |     |
| SGLT2_MAGIC     | Gleason score                                           | Wald ratio | 1     | 0.130  | 0.156 | -0.175 | 0.436 | 0.403 | NA    | NA   | NA     | NA    | NA     | NA | 0.878 | 0.647 | 1.191  |     |
| SGLT2_MAGIC     | High vs low aggressive prostate cancer                  | Wald ratio | 1     | 0.065  | 0.512 | -0.938 | 1.068 | 0.899 | NA    | NA   | NA     | NA    | NA     | NA | 0.937 | 0.344 | 2.554  |     |
| SGLT2_MAGIC     | High vs low and intermediate aggressive prostate cancer | Wald ratio | 1     | 0.433  | 0.335 | -0.224 | 1.089 | 0.196 | NA    | NA   | NA     | NA    | NA     | NA | 0.640 | 0.337 | 1.251  |     |
| SGLT2_MAGIC     | Total prostate cancer                                   | Wald ratio | 1     | 0.416  | 0.207 | 0.011  | 0.822 | 0.044 | NA    | NA   | NA     | NA    | NA     | NA | 0.659 | 0.440 | 0.989  |     |
| SGLT2_MAGIC     | PSA levels                                              | Wald ratio | 1     | -0.114 | 0.086 | -0.283 | 0.055 | 0.185 | NA    | NA   | NA     | NA    | NA     | NA | 1.121 | 0.947 | 1.327  |     |

Notes: the conventional instrument selection process refers to seven genetic variants robustly associated with HBA1C (P<Se-8) in the SLCSA2 region. nSNP means the number of instruments been used in the MR analysis. Method is the MR method been used in the analysis. Beta, se, pval, lci and uci are the MR effect estimate, standard error, P value, lower and upper confidence intervals of the exposure on the outcome. Q, Q\_df and Q\_pval are the statistics that measuring heterogeneity across studies. Egger\_intercept, egger\_se and egger\_pval are statistics to estimating levels of pleiotropy. OR, LCI and UCI are the odds ratio, lower and upper confidence intervals of MR effect scaled from log odds ratio to odds ratio.

**Supplementary Table 8. Genetic colocalization estimates of SGLT2 (proxied by HbA1c) on prostate cancer in the SCL5A2 region. Related to STAR Methods**

| Trait1                                         | Trait2                | nsnp | PP.H4/(PP.H3+PP.H4) |
|------------------------------------------------|-----------------------|------|---------------------|
| SGLT2 (proxied by its HbA1c lowering effect)   | Total prostate cancer | 2291 | 71.91%              |
| SGLT2 (proxied by expression levels of SLC5A2) | Total prostate cancer | 256  | 90.75%              |

Notes: we are under the assumption that PP.H0, PP.H1 and PP.H2 were unlikely to be true given strong MR evidence to support a genetic signal in both exposure (trait1) and outcome (trait2). We therefore estimated the probability of PP.H4/(PP.H3+PP.H4) as the evidence source for colocalization. nsnp means the number of genetic variants been used in the colocalization analysis.

Supplementary Table 9. Phenome-wide association (PheWAS) results of SLGT2 instruments. The PheWAS association with P value < 1e-5 was listed in this table. Related to STAR Methods

| Phenotype                                                    | id.phenotype       | Variant ID | chr | position | Effect_allele | Other_allele | Effect_allele_beta | se     | p     | n        |        |
|--------------------------------------------------------------|--------------------|------------|-----|----------|---------------|--------------|--------------------|--------|-------|----------|--------|
| Red cell distribution width                                  | ebi-a-GCST90002404 | rs8050500  | 16  | 31404571 | C             | T            | 0.446              | -0.026 | 0.002 | 4.00E-35 | 408112 |
| High light scatter reticulocyte percentage of red cells      | ebi-a-GCST90002386 | rs8050500  | 16  | 31404571 | C             | T            | 0.446              | 0.019  | 0.002 | 1.80E-19 | 408112 |
| Sum basophil neutrophil counts                               | ebi-a-GCST004621   | rs8050500  | 16  | 31404571 | C             | T            | 0.446              | -0.032 | 0.004 | 5.22E-19 | 171529 |
| Hip circumference                                            | ukb-b-15590        | rs55766044 | 16  | 31117698 | T             | C            | 0.280              | 0.018  | 0.002 | 1.70E-15 | 462117 |
| Weight                                                       | ukb-b-11842        | rs55766044 | 16  | 31117698 | T             | C            | 0.280              | 0.015  | 0.002 | 1.30E-14 | 461632 |
| Red cell distribution width                                  | ebi-a-GCST006804   | rs8050500  | 16  | 31404571 | C             | T            | 0.446              | -0.030 | 0.004 | 1.40E-14 | 116666 |
| Waist circumference                                          | ukb-b-9405         | rs55766044 | 16  | 31117698 | T             | C            | 0.280              | 0.015  | 0.002 | 5.70E-14 | 462166 |
| Trunk fat mass                                               | ukb-b-20044        | rs55766044 | 16  | 31117698 | T             | C            | 0.280              | 0.017  | 0.002 | 7.00E-14 | 454888 |
| Weight                                                       | ukb-b-12039        | rs55766044 | 16  | 31117698 | T             | C            | 0.280              | 0.014  | 0.002 | 1.00E-13 | 454893 |
| Arm fat mass (right)                                         | ukb-b-6704         | rs55766044 | 16  | 31117698 | T             | C            | 0.280              | 0.016  | 0.002 | 1.30E-13 | 454757 |
| Arm fat mass (left)                                          | ukb-b-8338         | rs55766044 | 16  | 31117698 | T             | C            | 0.280              | 0.016  | 0.002 | 2.20E-13 | 454684 |
| Whole body fat mass                                          | ukb-b-19393        | rs55766044 | 16  | 31117698 | T             | C            | 0.280              | 0.016  | 0.002 | 6.50E-13 | 454137 |
| Trunk fat percentage                                         | ukb-b-16407        | rs55766044 | 16  | 31117698 | T             | C            | 0.280              | 0.014  | 0.002 | 3.30E-12 | 454613 |
| Leg fat mass (right)                                         | ukb-b-18096        | rs55766044 | 16  | 31117698 | T             | C            | 0.280              | 0.012  | 0.002 | 6.50E-12 | 454846 |
| Arm fat percentage (right)                                   | ukb-b-12854        | rs55766044 | 16  | 31117698 | T             | C            | 0.280              | 0.012  | 0.002 | 7.80E-12 | 454789 |
| Body fat percentage                                          | ukb-b-8909         | rs55766044 | 16  | 31117698 | T             | C            | 0.280              | 0.012  | 0.002 | 7.80E-12 | 454633 |
| Low density lipoprotein cholesterol levels                   | ebi-a-GCST90002412 | rs55766044 | 16  | 31117698 | T             | C            | 0.280              | 0.015  | 0.002 | 3.90E-13 | 431167 |
| Leg fat mass (left)                                          | ukb-b-7212         | rs55766044 | 16  | 31117698 | T             | C            | 0.280              | 0.012  | 0.002 | 8.80E-12 | 454823 |
| Arm fat percentage (left)                                    | ukb-b-20188        | rs55766044 | 16  | 31117698 | T             | C            | 0.280              | 0.012  | 0.002 | 9.10E-12 | 454724 |
| diastolic blood pressure                                     | ieu-b-39           | rs55766044 | 16  | 31117698 | T             | C            | 0.279              | 0.130  | 0.020 | 5.04E-11 | 721678 |
| Red cell distribution width                                  | ebi-a-GCST90002404 | rs28692853 | 16  | 31573030 | A             | C            | 0.506              | -0.013 | 0.002 | 4.60E-10 | 408112 |
| Basal metabolic rate                                         | ukb-b-16446        | rs55766044 | 16  | 31117698 | T             | C            | 0.280              | 0.009  | 0.001 | 2.60E-09 | 454874 |
| Leg fat percentage (left)                                    | ukb-b-18377        | rs55766044 | 16  | 31117698 | T             | C            | 0.280              | 0.008  | 0.001 | 3.30E-09 | 454826 |
| Leg fat percentage (right)                                   | ukb-b-20531        | rs55766044 | 16  | 31117698 | T             | C            | 0.280              | 0.008  | 0.001 | 4.20E-09 | 454854 |
| Body mass index (BMI)                                        | ukb-b-19953        | rs55766044 | 16  | 31117698 | T             | C            | 0.280              | 0.013  | 0.002 | 4.30E-09 | 461460 |
| Alzheimer's disease or family history of Alzheimer's disease | ebi-a-GCST90012877 | rs55766044 | 16  | 31117698 | T             | C            | 0.280              | -0.062 | 0.011 | 7.32E-09 | 472868 |
| Body mass index (BMI)                                        | ukb-b-2303         | rs55766044 | 16  | 31117698 | T             | C            | 0.280              | 0.013  | 0.002 | 7.40E-09 | 454884 |
| Arm predicted mass (left)                                    | ukb-b-9093         | rs55766044 | 16  | 31117698 | T             | C            | 0.280              | 0.008  | 0.001 | 1.30E-08 | 454655 |
| Snoring                                                      | ukb-b-17400        | rs55766044 | 16  | 31117698 | T             | C            | 0.280              | -0.006 | 0.001 | 1.60E-08 | 430438 |
| Diastolic blood pressure, automated reading                  | ukb-b-7992         | rs55766044 | 16  | 31117698 | T             | C            | 0.280              | 0.013  | 0.002 | 1.80E-08 | 436424 |
| Red cell distribution width                                  | ebi-a-GCST90002404 | rs28675289 | 16  | 31463252 | T             | C            | 0.045              | -0.029 | 0.005 | 2.10E-08 | 408112 |
| Worry                                                        | ebi-a-GCST006478   | rs55766044 | 16  | 31117698 | T             | C            | NA                 | -0.015 | 0.003 | 3.30E-08 | 348219 |
| Snoring                                                      | ebi-a-GCST009760   | rs55766044 | 16  | 31117698 | T             | C            | NA                 | 0.006  | 0.001 | 4.30E-08 | 408317 |
| Comparative body size at age 10                              | ukb-b-4650         | rs55766044 | 16  | 31117698 | T             | C            | 0.280              | 0.009  | 0.002 | 4.40E-08 | 454718 |

Notes: Phenotype is the exposure that been proxied by the genetic instruments. id.phenotype is the IEU OpenGWAS database ID of the outcome. Variant ID, CHR and Position are the ID, chromosome and position of the genetic variant. Effect allele, other allele, effect allele freq, beta, SE, N and P are the genetic association information of the genetic variant on the exposure.

**Supplementary Table 10. Genetic instruments used for the multivariable Mendelian randomization model and the multivariable Mendelian randomization results. Related to STAR Methods**  
**Supplementary Table 10A. Genetic instruments for SGLT2 and red blood cell distribution been used in the multivariable Mendelian randomization model. Related to STAR Methods**

| Phenotype                                  | SNP         | Effect_allele | Other_allele | Effect_allele_freq | Beta    | Se     | P        |
|--------------------------------------------|-------------|---------------|--------------|--------------------|---------|--------|----------|
| SGLT2 primary                              | rs1232538   | T             | G            | 0.273              | 0.011   | 0.004  | 4.20E-03 |
| SGLT2 primary                              | rs28675289  | T             | C            | 0.044              | -0.040  | 0.008  | 2.66E-06 |
| SGLT2 primary                              | rs28692853  | A             | C            | 0.507              | -0.018  | 0.003  | 3.16E-07 |
| SGLT2 primary                              | rs45625038  | T             | C            | 0.030              | 0.031   | 0.010  | 2.45E-03 |
| SGLT2 primary                              | rs55766044  | T             | C            | 0.280              | 0.017   | 0.004  | 1.54E-05 |
| SGLT2 primary                              | rs557720784 | T             | C            | 0.054              | 0.029   | 0.008  | 2.16E-04 |
| SGLT2 primary                              | rs8050500   | C             | T            | 0.446              | -0.029  | 0.003  | 2.03E-17 |
| Red blood cell (erythrocyte) count         | rs1232538   | T             | G            | 0.273              | -0.003  | 0.002  | 2.03E-01 |
| Red blood cell (erythrocyte) count         | rs28675289  | T             | C            | 0.044              | -0.003  | 0.005  | 5.97E-01 |
| Red blood cell (erythrocyte) count         | rs28692853  | A             | C            | 0.508              | -0.002  | 0.002  | 2.68E-01 |
| Red blood cell (erythrocyte) count         | rs45625038  | T             | C            | 0.030              | -0.009  | 0.006  | 1.29E-01 |
| Red blood cell (erythrocyte) count         | rs55766044  | T             | C            | 0.280              | -0.015  | 0.002  | 1.11E-10 |
| Red blood cell (erythrocyte) count         | rs557720784 | T             | C            | 0.053              | 0.000   | 0.005  | 9.24E-01 |
| Red blood cell (erythrocyte) count         | rs8050500   | C             | T            | 0.446              | -0.009  | 0.002  | 8.67E-06 |
| Phenotype                                  | SNP         | Effect_allele | Other_allele | Effect_allele_freq | Beta    | Se     | P        |
| SGLT2 primary                              | rs1232538   | T             | G            | 0.273              | 0.011   | 0.004  | 4.20E-03 |
| SGLT2 primary                              | rs28675289  | T             | C            | 0.044              | -0.040  | 0.008  | 2.66E-06 |
| SGLT2 primary                              | rs28692853  | A             | C            | 0.507              | -0.018  | 0.003  | 3.16E-07 |
| SGLT2 primary                              | rs45625038  | T             | C            | 0.030              | 0.031   | 0.010  | 2.45E-03 |
| SGLT2 primary                              | rs55766044  | T             | C            | 0.280              | 0.017   | 0.004  | 1.54E-05 |
| SGLT2 primary                              | rs8050500   | C             | T            | 0.446              | -0.029  | 0.003  | 2.03E-17 |
| Body mass index                            | rs1232538   | T             | G            | 0.602              | 0.003   | 0.003  | 2.70E-01 |
| Body mass index                            | rs28675289  | T             | C            | 0.678              | -0.008  | 0.006  | 2.30E-01 |
| Body mass index                            | rs28692853  | A             | C            | 0.491              | 0.002   | 0.003  | 4.40E-01 |
| Body mass index                            | rs45625038  | T             | C            | 0.693              | 0.002   | 0.011  | 8.80E-01 |
| Body mass index                            | rs55766044  | T             | C            | 0.588              | 0.014   | 0.003  | 1.20E-05 |
| Body mass index                            | rs8050500   | C             | T            | 0.523              | 0.005   | 0.003  | 5.90E-02 |
| Phenotype                                  | SNP         | Effect_allele | Other_allele | Effect_allele_freq | Beta    | Se     | P        |
| SGLT2 primary                              | rs1232538   | T             | G            | 0.273              | 0.011   | 0.004  | 4.20E-03 |
| SGLT2 primary                              | rs28675289  | T             | C            | 0.044              | -0.040  | 0.008  | 2.66E-06 |
| SGLT2 primary                              | rs28692853  | A             | C            | 0.507              | -0.018  | 0.003  | 3.16E-07 |
| SGLT2 primary                              | rs45625038  | T             | C            | 0.030              | 0.031   | 0.010  | 2.45E-03 |
| SGLT2 primary                              | rs55766044  | T             | C            | 0.280              | 0.017   | 0.004  | 1.54E-05 |
| SGLT2 primary                              | rs557720784 | T             | C            | 0.054              | 0.029   | 0.008  | 2.16E-04 |
| SGLT2 primary                              | rs8050500   | C             | T            | 0.446              | -0.029  | 0.003  | 2.03E-17 |
| Low density lipoprotein cholesterol levels | rs1232538   | T             | G            | 0.274              | 0.004   | 0.002  | 9.70E-02 |
| Low density lipoprotein cholesterol levels | rs28675289  | T             | C            | 0.045              | -0.010  | 0.005  | 4.00E-02 |
| Low density lipoprotein cholesterol levels | rs28692853  | A             | C            | 0.506              | 0.000   | 0.002  | 9.00E-01 |
| Low density lipoprotein cholesterol levels | rs45625038  | T             | C            | 0.029              | 0.008   | 0.006  | 1.50E-01 |
| Low density lipoprotein cholesterol levels | rs55766044  | T             | C            | 0.280              | 0.015   | 0.002  | 3.90E-13 |
| Low density lipoprotein cholesterol levels | rs557720784 | T             | C            | 0.052              | -0.008  | 0.004  | 8.40E-02 |
| Low density lipoprotein cholesterol levels | rs8050500   | C             | T            | 0.445              | 0.001   | 0.002  | 6.80E-01 |
| Phenotype                                  | SNP         | Effect_allele | Other_allele | Effect_allele_freq | Beta    | Se     | P        |
| SGLT2 primary                              | rs1232538   | T             | G            | 0.273              | 0.011   | 0.004  | 4.20E-03 |
| SGLT2 primary                              | rs28675289  | T             | C            | 0.044              | -0.040  | 0.008  | 2.66E-06 |
| SGLT2 primary                              | rs28692853  | A             | C            | 0.507              | -0.018  | 0.003  | 3.16E-07 |
| SGLT2 primary                              | rs45625038  | T             | C            | 0.030              | 0.031   | 0.010  | 2.45E-03 |
| SGLT2 primary                              | rs55766044  | T             | C            | 0.280              | 0.017   | 0.004  | 1.54E-05 |
| SGLT2 primary                              | rs8050500   | C             | T            | 0.446              | -0.029  | 0.003  | 2.03E-17 |
| diastolic blood pressure                   | rs1232538   | T             | G            | 0.280              | -0.003  | 0.019  | 8.91E-01 |
| diastolic blood pressure                   | rs28675289  | T             | C            | 0.047              | -0.006  | 0.044  | 8.86E-01 |
| diastolic blood pressure                   | rs28692853  | A             | C            | 0.499              | 0.012   | 0.017  | 4.86E-01 |
| diastolic blood pressure                   | rs45625038  | T             | C            | 0.028              | -0.018  | 0.058  | 7.64E-01 |
| diastolic blood pressure                   | rs55766044  | T             | C            | 0.279              | 0.130   | 0.020  | 5.04E-11 |
| diastolic blood pressure                   | rs8050500   | C             | T            | 0.445              | -0.009  | 0.018  | 6.11E-01 |
| Phenotype                                  | SNP         | Effect_allele | Other_allele | Effect_allele_freq | Beta    | Se     | P        |
| SGLT2 primary                              | rs1232538   | T             | G            | 0.273              | 0.011   | 0.004  | 4.20E-03 |
| SGLT2 primary                              | rs28675289  | T             | C            | 0.044              | -0.040  | 0.008  | 2.66E-06 |
| SGLT2 primary                              | rs28692853  | A             | C            | 0.507              | -0.018  | 0.003  | 3.16E-07 |
| SGLT2 primary                              | rs45625038  | T             | C            | 0.030              | 0.031   | 0.010  | 2.45E-03 |
| SGLT2 primary                              | rs55766044  | T             | C            | 0.280              | 0.017   | 0.004  | 1.54E-05 |
| SGLT2 primary                              | rs8050500   | C             | T            | 0.446              | -0.029  | 0.003  | 2.03E-17 |
| Type 2 diabetes                            | rs1232538   | T             | G            | 0.290              | 0.0051  | 0.0042 | 0.227    |
| Type 2 diabetes                            | rs28675289  | T             | C            | 0.055              | -0.0059 | 0.0084 | 0.482    |
| Type 2 diabetes                            | rs28692853  | A             | C            | 0.489              | -0.0089 | 0.0037 | 0.016    |
| Type 2 diabetes                            | rs45625038  | T             | C            | 0.023              | -0.0032 | 0.0131 | 0.807    |
| Type 2 diabetes                            | rs55766044  | T             | C            | 0.291              | 0.0114  | 0.0041 | 0.005    |
| Type 2 diabetes                            | rs8050500   | C             | T            | 0.442              | -0.0074 | 0.0038 | 0.048    |

Notes: Phenotype is the exposure that been proxied by the genetic instruments. Variant ID, CHR and Position are the ID, chromosome and position of the genetic variant. Effect allele, other allele, effect allele freq, beta, SE, N and P are the genetic association information of the genetic variant on the exposure.

**Supplementary Table 10B. Multivariable Mendelian randomization estimate of SGLT2 on prostate cancer adjusted for red blood cell distribution. Related to STAR Methods**

| exposure                                   | outcome         | nsp | beta   | se    | pval     | ci.lb  | ci.ub | OR    | LCI   | UCI   |
|--------------------------------------------|-----------------|-----|--------|-------|----------|--------|-------|-------|-------|-------|
| SGLT2 primary                              | Prostate cancer | 7   | 0.580  | 0.143 | 4.96E-05 | 0.300  | 0.861 | 0.560 | 0.423 | 0.741 |
| Red blood cell (erythrocyte) count         | Prostate cancer | 7   | 0.299  | 0.367 | 0.416    | -0.421 | 1.019 | 0.741 | 0.361 | 1.524 |
| exposure                                   | outcome         | nsp | beta   | se    | pval     | ci.lb  | ci.ub | OR    | LCI   | UCI   |
| SGLT2 primary                              | Prostate cancer | 6   | 0.538  | 0.079 | 8.64E-12 | 0.383  | 0.692 | 0.584 | 0.500 | 0.681 |
| Body mass index                            | Prostate cancer | 6   | -0.387 | 0.223 | 0.082    | -0.824 | 0.049 | 1.473 | 0.952 | 2.280 |
| exposure                                   | outcome         | nsp | beta   | se    | pval     | ci.lb  | ci.ub | OR    | LCI   | UCI   |
| SGLT2 primary                              | Prostate cancer | 7   | 0.690  | 0.129 | 9.32E-08 | 0.436  | 0.943 | 0.502 | 0.390 | 0.646 |
| Low density lipoprotein cholesterol levels | Prostate cancer | 7   | -0.663 | 0.352 | 0.060    | -1.354 | 0.028 | 1.941 | 0.973 | 3.872 |
| exposure                                   | outcome         | nsp | beta   | se    | pval     | ci.lb  | ci.ub | OR    | LCI   | UCI   |
| SGLT2 primary                              | Prostate cancer | 6   | 0.561  | 0.090 | 3.91E-10 | 0.386  | 0.737 | 0.570 | 0.478 | 0.680 |
| diastolic blood pressure                   | Prostate cancer | 6   | -0.044 | 0.030 | 0.148    | -0.104 | 0.016 | 1.045 | 0.985 | 1.110 |
| exposure                                   | outcome         | nsp | beta   | se    | pval     | ci.lb  | ci.ub | OR    | LCI   | UCI   |
| SGLT2 primary                              | Prostate cancer | 6   | 0.494  | 0.212 | 1.97E-02 | 0.079  | 0.909 | 0.610 | 0.403 | 0.924 |
| Type 2 diabetes                            | Prostate cancer | 6   | 0.054  | 0.536 | 0.920    | -0.996 | 1.104 | 0.947 | 0.332 | 2.707 |

Notes: nsp means the number of instruments been used in the MR analysis. Beta, se, pval, ci.lb and ci.ub are the MR effect estimate, standard error, P value, lower and upper confidence intervals of the exposure on the outcome. OR, LCI and UCI are the odds ratio, lower and upper confidence intervals of MR effect scaled from log odds ratio to odds ratio.

Supplementary Table 11. Genetic associations of the two SGLT2 instruments on expression level of other genes in nearby gene regions. Genetic variants with genetic association  $P < 1 \times 10^{-4}$  was listed in this table. Related to STAR Methods

| Gene ID         | Gene          | Variant ID | CHR | Position | Effect_allele | Other_allele | Effect_allele_freq | Beta   | SE    | N     | P         | Known glycaemic gene? | Drug            | Drug function                             |
|-----------------|---------------|------------|-----|----------|---------------|--------------|--------------------|--------|-------|-------|-----------|-----------------------|-----------------|-------------------------------------------|
| ENSG00000131797 | CLUHP3        | rs35445454 | 16  | 31699326 | T             | C            | 0.336              | -0.549 | 0.012 | 17997 | 3.27E-300 | NO                    | NA              | NA                                        |
| ENSG00000156886 | ITGAD         | rs9930811  | 16  | 31400360 | G             | A            | 0.351              | -0.290 | 0.012 | 31346 | 2.67E-124 | NO                    | NA              | NA                                        |
| ENSG00000161731 | CTD-2358C21.4 | rs35445454 | 16  | 31699326 | T             | C            | 0.336              | -0.292 | 0.012 | 3851  | 2.70E-123 | NO                    | NA              | NA                                        |
| ENSG00000140678 | ITGAX         | rs9930811  | 16  | 31400360 | G             | A            | 0.351              | -0.287 | 0.012 | 26057 | 1.19E-121 | NO                    | NA              | NA                                        |
| ENSG00000131797 | CLUHP3        | rs9930811  | 16  | 31400360 | G             | A            | 0.351              | -0.180 | 0.012 | 22545 | 3.91E-48  | NO                    | NA              | NA                                        |
| ENSG00000140678 | ITGAX         | rs35445454 | 16  | 31699326 | T             | C            | 0.336              | -0.181 | 0.013 | 21723 | 3.30E-47  | NO                    | NA              | NA                                        |
| ENSG00000140691 | ARMCS         | rs9930811  | 16  | 31400360 | G             | A            | 0.351              | 0.165  | 0.012 | 30597 | 1.56E-40  | NO                    | NA              | NA                                        |
| ENSG00000156886 | ITGAD         | rs35445454 | 16  | 31699326 | T             | C            | 0.336              | -0.139 | 0.013 | 26798 | 1.77E-28  | NO                    | NA              | NA                                        |
| ENSG00000103507 | BCKDK         | rs9930811  | 16  | 31400360 | G             | A            | 0.351              | -0.119 | 0.012 | 31346 | 7.59E-22  | NO                    | NA              | NA                                        |
| ENSG00000140682 | TGFBI1        | rs9930811  | 16  | 31400360 | G             | A            | 0.351              | -0.119 | 0.012 | 31132 | 8.86E-22  | NO                    | NA              | NA                                        |
| ENSG00000261245 | RP11-120K3.3  | rs9930811  | 16  | 31400360 | G             | A            | 0.351              | -0.105 | 0.012 | 4656  | 4.16E-17  | NO                    | NA              | NA                                        |
| ENSG00000260911 | RP11-196G11.2 | rs9930811  | 16  | 31400360 | G             | A            | 0.351              | 0.097  | 0.012 | 5164  | 7.38E-15  | NO                    | NA              | NA                                        |
| ENSG00000103496 | STX4          | rs9930811  | 16  | 31400360 | G             | A            | 0.351              | 0.094  | 0.012 | 31132 | 3.41E-14  | NO                    | PHENPROCOUMON   | Anticoagulant                             |
| ENSG00000197302 | ZNF720        | rs35445454 | 16  | 31699326 | T             | C            | 0.336              | -0.093 | 0.013 | 26758 | 1.07E-13  | NO                    | NA              | NA                                        |
| ENSG00000167394 | ZNF668        | rs9930811  | 16  | 31400360 | G             | A            | 0.351              | -0.077 | 0.012 | 31346 | 6.76E-10  | NO                    | NA              | NA                                        |
| ENSG00000103549 | RNF40         | rs9930811  | 16  | 31400360 | G             | A            | 0.351              | -0.075 | 0.012 | 31346 | 1.45E-09  | NO                    | NA              | NA                                        |
| ENSG00000161731 | CTD-2358C21.4 | rs9930811  | 16  | 31400360 | G             | A            | 0.351              | -0.070 | 0.012 | 4656  | 1.80E-08  | NO                    | NA              | NA                                        |
| ENSG00000169877 | AHSP          | rs9930811  | 16  | 31400360 | G             | A            | 0.351              | 0.069  | 0.012 | 31346 | 2.67E-08  | NO                    | NA              | NA                                        |
| ENSG00000140688 | C16orf58      | rs9930811  | 16  | 31400360 | G             | A            | 0.351              | 0.064  | 0.012 | 31346 | 2.46E-07  | NO                    | NA              | NA                                        |
| ENSG00000099377 | HSD3B7        | rs9930811  | 16  | 31400360 | G             | A            | 0.351              | -0.063 | 0.012 | 31346 | 3.74E-07  | NO                    | NA              | NA                                        |
| ENSG00000140691 | ARMCS         | rs35445454 | 16  | 31699326 | T             | C            | 0.336              | 0.064  | 0.013 | 26049 | 3.80E-07  | NO                    | NA              | NA                                        |
| ENSG00000103507 | BCKDK         | rs35445454 | 16  | 31699326 | T             | C            | 0.336              | -0.061 | 0.013 | 26798 | 1.39E-06  | NO                    | NA              | NA                                        |
| ENSG00000169877 | AHSP          | rs35445454 | 16  | 31699326 | T             | C            | 0.336              | 0.060  | 0.013 | 26798 | 1.39E-06  | NO                    | NA              | NA                                        |
| ENSG00000169896 | ITGAM         | rs9930811  | 16  | 31400360 | G             | A            | 0.351              | -0.056 | 0.012 | 31346 | 5.98E-06  | NO                    | ROVELIZUMAB     | Treat paroxysmal nocturnal hemoglobinuria |
| ENSG00000140675 | SLC5A2        | rs9930811  | 16  | 31400360 | G             | A            | 0.351              | 0.052  | 0.012 | 31306 | 3.05E-05  | NO                    | SGLT2 inhibitor | Treat diabetes                            |

Notes: The expression data of gene were obtained from whole blood. Gene ID and Gene refers to each gene in the nearby genomic region. Variant ID, CHR and Position are the ID, chromosome and position of the genetic variant. Effect allele, other allele, effect allele freq, beta, SE, N and P are the genetic association information of the genetic variant on the expression of the related gene. Known glycaemic gene, drug and function are the annotations of related gene, which refers to whether the gene is a reported gene for any glycaemic traits, whether the gene has any interaction with any drug as well as the function of the related drug.

Supplementary Table 12. Association between use of SGLT2i compared with DPP4i and risk of prostate cancer. Related to STAR Methods

|               | Original cohort |              |                |        |              |                |                       | PS-matched cohort |              |                |        |              |                |                       |
|---------------|-----------------|--------------|----------------|--------|--------------|----------------|-----------------------|-------------------|--------------|----------------|--------|--------------|----------------|-----------------------|
|               | SGLT2i          |              |                | DPP4i  |              |                | Hazard ratio (95% CI) | SGLT2i            |              |                | DPP4i  |              |                | Hazard ratio (95% CI) |
|               | Events          | Person years | Incidence rate | Events | Person years | Incidence rate |                       | Events            | Person years | Incidence rate | Events | Person years | Incidence rate |                       |
| Main analysis | 114             | 25171.09     | 452.90         | 574    | 102208.72    | 561.60         | 0.76 (0.61-0.94)      | 106               | 22678.6      | 467.4          | 224    | 45458.9      | 492.75         | 0.77 (0.61-0.99)      |
| Lag period    |                 |              |                |        |              |                |                       |                   |              |                |        |              |                |                       |
| 1-month       | 85              | 25119.20     | 338.39         | 451    | 102153.20    | 441.49         | 0.86 (0.67-1.10)      | 80                | 22662.70     | 353            | 182    | 44455.1      | 409.40         | 0.81 (0.61-1.07)      |
| 2-month       | 74              | 24952.08     | 296.57         | 423    | 101978.74    | 414.79         | 0.83 (0.64-1.09)      | 69                | 22585        | 305.51         | 172    | 43573.6      | 394.73         | 0.75 (0.56-1.00)      |
| 3-month       | 67              | 24733.13     | 270.89         | 408    | 101759.12    | 400.95         | 0.81 (0.62-1.07)      | 63                | 22425.8      | 280.93         | 164    | 42548.9      | 385.44         | 0.78 (0.57-1.06)      |
| 6-month       | 49              | 23449.53     | 208.96         | 339    | 100444.48    | 337.50         | 0.90 (0.66-1.25)      | 46                | 21423.9      | 214.71         | 143    | 38982.9      | 366.83         | 0.75 (0.53-1.08)      |

Notes: prostate cancer refers to individuals with incident prostate cancer plus those with total prostate specific antigen [PSA] level >10 ng/mL during the follow-up period SGLT2i. PS-matched cohort refers to 1:1 propensity-score matching cohort of 48,310 patients, sodium-glucose cotransporter-2 inhibitor; CI, confidence interval. The unit of the incidence rate was 100,000 person years.



**Supplementary Table 13. Association between HbA1c levels and type 2 diabetes with total prostate cancer. Related to STAR Methods**

**Supplementary Table 13A. Mendelian randomization estimates of HbA1c levels on total prostate cancer. Related to STAR Methods**

| exposure                                                | outcome                     | method                    | nsnp | b      | se    | pval  | Q       | Q_df | Q_pval   | Ici    | uci   | OR (inhibitio | OR_UCI | OR_LCL |
|---------------------------------------------------------|-----------------------------|---------------------------|------|--------|-------|-------|---------|------|----------|--------|-------|---------------|--------|--------|
| Glycated haemoglobin (UK Biobank)                       | Prostate cancer (PRACTICAL) | Inverse variance weighted | 287  | 0.016  | 0.032 | 0.629 | 992.021 | 286  | 1.15E-78 | -0.048 | 0.079 | 0.984         | 1.049  | 0.924  |
| Glycated haemoglobin (UK Biobank)                       | Prostate cancer (PRACTICAL) | Weighted median           | 287  | -0.029 | 0.034 | 0.394 | NR      | NR   | NR       | -0.096 | 0.038 | 1.029         | 1.100  | 0.963  |
| Glycated haemoglobin (UK Biobank)                       | Prostate cancer (PRACTICAL) | Simple mode               | 287  | -0.009 | 0.073 | 0.899 | NR      | NR   | NR       | -0.151 | 0.133 | 1.009         | 1.163  | 0.876  |
| Glycated haemoglobin (UK Biobank)                       | Prostate cancer (PRACTICAL) | Weighted mode             | 287  | -0.009 | 0.031 | 0.768 | NR      | NR   | NR       | -0.071 | 0.052 | 1.009         | 1.073  | 0.949  |
| Glycated haemoglobin (MAGIC)                            | Prostate cancer (PRACTICAL) | Inverse variance weighted | 91   | 0.004  | 0.019 | 0.816 | 272.549 | 90   | 2.98E-20 | -0.033 | 0.042 | 0.996         | 1.034  | 0.959  |
| Glycated haemoglobin (MAGIC)                            | Prostate cancer (PRACTICAL) | Weighted median           | 91   | 0.003  | 0.020 | 0.879 | NR      | NR   | NR       | -0.036 | 0.042 | 0.997         | 1.037  | 0.958  |
| Glycated haemoglobin (MAGIC)                            | Prostate cancer (PRACTICAL) | Simple mode               | 91   | 0.034  | 0.038 | 0.384 | NR      | NR   | NR       | -0.042 | 0.109 | 0.967         | 1.043  | 0.897  |
| Glycated haemoglobin (MAGIC)                            | Prostate cancer (PRACTICAL) | Weighted mode             | 91   | 0.006  | 0.022 | 0.791 | NR      | NR   | NR       | -0.038 | 0.050 | 0.994         | 1.039  | 0.951  |
| Glycated haemoglobin without SGLT2 variant (UK Biobank) | Prostate cancer (PRACTICAL) | Inverse variance weighted | 268  | -0.007 | 0.024 | 0.778 | 813.157 | 267  | 1.58E-56 | -0.054 | 0.041 | 1.007         | 1.056  | 0.960  |
| Glycated haemoglobin without SGLT2 variant (UK Biobank) | Prostate cancer (PRACTICAL) | Weighted median           | 268  | -0.021 | 0.027 | 0.446 | NR      | NR   | NR       | -0.074 | 0.033 | 1.021         | 1.077  | 0.968  |
| Glycated haemoglobin without SGLT2 variant (UK Biobank) | Prostate cancer (PRACTICAL) | Simple mode               | 268  | -0.023 | 0.060 | 0.700 | NR      | NR   | NR       | -0.141 | 0.094 | 1.023         | 1.151  | 0.910  |
| Glycated haemoglobin without SGLT2 variant (UK Biobank) | Prostate cancer (PRACTICAL) | Weighted mode             | 268  | -0.013 | 0.023 | 0.581 | NR      | NR   | NR       | -0.057 | 0.032 | 1.013         | 1.059  | 0.969  |

**Supplementary Table 13B. Association of observed HbA1c (mmol/mol) with prostate cancer incidence in 165,430 men with European ancestry from UK Biobank. Related to STAR Methods**

| Cox model           | Considering competing risk in the model                  | N cases/N control | HR (95% CI) per 1 increase in HbA1c |
|---------------------|----------------------------------------------------------|-------------------|-------------------------------------|
| Crude               | No                                                       | 7986/157,444      | 1.02 (1.01, 1.02)                   |
|                     | Yes                                                      |                   |                                     |
| Crude               | (13,192 men dead due to other reasons before 2022-02-01) | 7986/157,444      | 1.02 (1.01, 1.03)                   |
|                     |                                                          |                   |                                     |
| Confounder-adjusted | No                                                       | 7789/153,633      | 0.99 (0.99, 1.00)                   |
|                     | Yes                                                      |                   |                                     |
| Confounder-adjusted | (12,498 men dead due to other reasons before 2022-02-01) | 7789/153,633      | 0.99 (0.99, 1.00)                   |
|                     |                                                          |                   |                                     |

Note: age, BMI, smoking status, alcohol consumption, physical activity and diet score were adjusted as covariates in the Cox model.

**Supplementary Table 13C. Association of baseline type 2 diabetes with prostate cancer incidence in men with East Asian ancestry from 4C. Related to STAR Methods**

|                                       | NGR              | IGR              | T2DM             |
|---------------------------------------|------------------|------------------|------------------|
| Events                                | 36               | 103              | 74               |
| Incidence rate (per 1000 person-year) | 0.32 (0.23-0.45) | 0.36 (0.30-0.44) | 0.47 (0.37-0.60) |
| Multivariable adjusted HR (95%CI)     | 1.0 (reference)  | 0.93 (0.61-1.42) | 1.13 (0.72-1.75) |
| Multivariable adjusted HR (95%CI)*    | 1.0 (reference)  | 0.92 (0.61-1.40) | 1.09 (0.70-1.70) |

Note: NGR, normal glucose regulation; IGR, impaired glucose regulation; T2DM, Type 2 diabetes mellitus. Adjusted for age, gender, body-mass index, family history of diabetes, smoking, drinking, high school or above education, moderate or vigorous physical activity, diet score, systolic blood pressure, LDL-cholesterol. \*Excluding prostate cancers occur during the first year.

Supplementary Table 14. MELODI Preso results to identify potential intermediate traits that linking SGLT2 inhibitors with prostate cancer. Related to STAR Methods

| X Subject                               | X Pval   | X Predicate    | Overlap                   | Y Predicate    | Y Object                           | Y Pval | Y               |
|-----------------------------------------|----------|----------------|---------------------------|----------------|------------------------------------|--------|-----------------|
| Sodium-Glucose Transporter 2 Inhibitor: | 0.00E+00 | TREATS         | Obesity                   | AUGMENTS       | Urinary Incontinence               | #####  | prostate_cancer |
| dapagliflozin                           | 0.00E+00 | TREATS         | Obesity                   | AUGMENTS       | Urinary Incontinence               | #####  | prostate_cancer |
| dapagliflozin                           | 6.80E-09 | STIMULATES     | FRAP1 protein, human MTOF | COEXISTS_WITH  | FLVCR1                             | #####  | prostate_cancer |
| canagliflozin                           | 6.80E-09 | STIMULATES     | Heme Oxygenase-1          | COEXISTS_WITH  | FLVCR1                             | #####  | prostate_cancer |
| canagliflozin                           | 6.80E-09 | STIMULATES     | Heme Oxygenase-1          | INTERACTS_WITH | FLVCR1                             | #####  | prostate_cancer |
| canagliflozin                           | 6.80E-09 | STIMULATES     | Heme Oxygenase-1          | STIMULATES     | VEGF protein, human VEGFA          | #####  | prostate_cancer |
| Licogliflozin                           | 6.80E-09 | TREATS         | Obesity                   | AUGMENTS       | Urinary Incontinence               | #####  | prostate_cancer |
| ertugliflozin                           | 6.80E-09 | TREATS         | Obesity                   | AUGMENTS       | Urinary Incontinence               | #####  | prostate_cancer |
| empagliflozin                           | 2.92E-06 | INTERACTS_WITH | cytokine                  | STIMULATES     | Androgen Receptor AR               | #####  | prostate_cancer |
| empagliflozin                           | 2.92E-06 | STIMULATES     | Heme Oxygenase-1          | COEXISTS_WITH  | FLVCR1                             | #####  | prostate_cancer |
| empagliflozin                           | 2.92E-06 | STIMULATES     | Heme Oxygenase-1          | INTERACTS_WITH | FLVCR1                             | #####  | prostate_cancer |
| dapagliflozin                           | 2.92E-06 | TREATS         | Coronary Arteriosclerosis | CAUSES         | Congestive heart failure           | #####  | prostate_cancer |
| Sodium-Glucose Transporter 2 Inhibitor: | 2.92E-06 | COEXISTS_WITH  | Insulin                   | STIMULATES     | Mitogen Activated Protein Kinase 1 | #####  | prostate_cancer |
| Sodium-Glucose Transporter 2 Inhibitor: | 2.92E-06 | INHIBITS       | Insulin                   | STIMULATES     | Mitogen Activated Protein Kinase 1 | #####  | prostate_cancer |
| dapagliflozin                           | 2.92E-06 | COEXISTS_WITH  | Insulin                   | STIMULATES     | Mitogen Activated Protein Kinase 1 | #####  | prostate_cancer |
| empagliflozin                           | 2.92E-06 | STIMULATES     | Heme Oxygenase-1          | STIMULATES     | VEGF protein, human VEGFA          | #####  | prostate_cancer |
| canagliflozin                           | 2.92E-06 | TREATS         | Obesity                   | AUGMENTS       | Urinary Incontinence               | #####  | prostate_cancer |
| empagliflozin                           | 2.92E-06 | INTERACTS_WITH | cytokine                  | COEXISTS_WITH  | FLVCR1                             | #####  | prostate_cancer |
